# Supplementary material
Source: PubMed Central journal article supplement (PMC9856920)
Supplement: jamapediatr-e224768-s001.pdf [file jamapediatr-e224768-s001.pdf]

## Supplemental Online Content

Yasuhara J, Masuda K, Aikawa T, et al. Myopericarditis after COVID-19 mRNA vaccination among adolescents and young adults: a systematic review and meta-analysis. *JAMA Pediatr*. Published online December 5, 2022. doi:10.1001/jamapediatrics.2022.4768

**eTable 1.** Search Strategy of MEDLINE via PubMed

**eTable 2.** Search Strategy of EMBASE

**eTable 3.** Characteristics of Observational Studies Included

**eTable 4.** Characteristics of Case Series Included

**eTable 5.** Definition of Myocarditis

**eTable 6.** Pooled Estimates for Clinical Characteristics and Outcomes From Subgroup Analyses Including Studies With Patients With Myocarditis

**eTable 7.** Joanna Briggs Institute Critical Appraisal Checklist for Prevalence Studies

**eTable 8.** Joanna Briggs Institute Critical Appraisal Checklist for Case Series

**eTable 9.** GRADE Evidence Profile for the Included Studies

**eTable 10.** Results of Egger Linear Regression Tests of the Clinical Presentation and Outcomes

**eTable 11.** Results of Point Estimate of the Clinical Presentation and Outcomes Using the Trim-and-Fill Analysis

**eFigure 1.** Forest Plots Showing the Pooled Estimates of Clinical Characteristics and Early Outcomes

**eFigure 2.** Forest Plots of Subgroup Analysis Including Studies With Only Patients With Myocarditis

**eFigure 3.** Risk of Bias Summary

**eFigure 4.** Funnel Plots of the Clinical Characteristics and Outcomes

**eFigure 5.** Adjusted Funnel Plots of the Clinical Characteristics and Outcomes From the Trim-and-Fill Analysis

This supplemental material has been provided by the authors to give readers additional information about their work.

**eTable 1.** Search Strategy of MEDLINE via PubMed

|     |                                                         |
|-----|---------------------------------------------------------|
| #1  | covid-19[mh]                                            |
| #2  | SARS-CoV-2[mh]                                          |
| #3  | “covid”[tiad]                                           |
| #4  | “coronavirus disease 2019”[tiad]                        |
| #5  | “coronavirus disease”[tiad]                             |
| #6  | “Severe Acute Respiratory Syndrome Coronavirus 2”[tiad] |
| #7  | #1 OR #2 OR #3 OR #4 OR #5 OR #6                        |
| #8  | Vaccination[mh]                                         |
| #9  | Vaccine[mh]                                             |
| #10 | “vaccines”[tiad]                                        |
| #11 | #8 OR #9 OR #10                                         |
| #12 | Myocarditis[mh]                                         |
| #13 | Myopericarditis[mh]                                     |
| #14 | Pericarditis                                            |
| #15 | #13 OR #14                                              |
| #16 | Adolescent[mh]                                          |
| #17 | Children                                                |
| #18 | Pediatric                                               |
| #19 | Young adult[mh]                                         |
| #20 | “child”[tiad]                                           |
| #21 | “young adults”[tiad]                                    |
| #22 | #16 OR #17 OR #18 OR #19 OR #20 OR #21                  |
| #23 | #7 AND #11 AND #15 AND #22                              |

**eTable 2.** Search Strategy of EMBASE

|     |                                                                                                                           |
|-----|---------------------------------------------------------------------------------------------------------------------------|
| #1  | exp covid-19/ or exp coronavirus disease 2019/ or exp SARS-CoV-2/ or exp severe Acute Respiratory Syndrome Coronavirus 2/ |
| #2  | (“covid-19” or “coronavirus disease 2019” or “SARS-CoV-2” or “severe Acute Respiratory Syndrome Coronavirus 2”).ti,ab,kw. |
| #3  | exp vaccination/ or exp vaccine/                                                                                          |
| #4  | (“vaccination” or “vaccine”).ti,ab,kw.                                                                                    |
| #5  | exp myocarditis/ or exp myopericarditis/ or exp pericarditis                                                              |
| #6  | (“myocarditis” or “myopericarditis” or “pericarditis”).ti,ab,kw.                                                          |
| #7  | exp adolescent/ or exp child/ or exp children/ or exp pediatric/ or exp young adult/ or exp young adults                  |
| #8  | (“adolescent” or “child” or “children” or “pediatric” or “young adult” or “young adults”).ti,ab,kw.                       |
| #9  | #1 or #2                                                                                                                  |
| #10 | #3 or #4                                                                                                                  |
| #11 | #5 or #6                                                                                                                  |
| #12 | #7 or #8                                                                                                                  |
| #13 | #9 and #10 and #11 and #12                                                                                                |

**eTable 3.** Characteristics of Observational Studies Included

| Author                        | Ethnicity, No. (%) |                  |          |           |                                   |           | Incident rate (per million persons)                              | Symptoms, No. (%) |            |           |           |           |
|-------------------------------|--------------------|------------------|----------|-----------|-----------------------------------|-----------|------------------------------------------------------------------|-------------------|------------|-----------|-----------|-----------|
|                               | Caucasian          | African American | Asian    | Hispanic  | Native American or Alaskan Native | Other     |                                                                  | Fever             | Chest pain | Dyspnea   | Headache  | Myalgia   |
| Li et al. <sup>19</sup>       | NA                 | NA               | NA       | NA        | NA                                | NA        | 1st dose 3.1; 2nd dose 22.2                                      | NA                | NA         | NA        | NA        | NA        |
| Krug et al. <sup>20</sup>     | NA                 | NA               | NA       | NA        | NA                                | NA        | 1st dose: Female 0.6, Male 10; 2nd dose: Female 12.7, Male 118.7 | NA                | NA         | NA        | NA        | NA        |
| Mevorach et al. <sup>21</sup> | NA                 | NA               | NA       | NA        | NA                                | NA        | NA                                                               | 4 (30.8)          | 13 (100)   | 4 (30.8)  | NA        | NA        |
| Truong et al. <sup>22</sup>   | 92 (66.1)          | 6 (4.3)          | 9 (6.5)  | 29 (20.9) | 2 (1.4)                           | 13 (10.1) | NA                                                               | 43 (30.9)         | 138 (99.2) | 38 (27.3) | 22 (15.8) | 19 (13.7) |
| Foltran et al. <sup>23</sup>  | NA                 | NA               | NA       | NA        | NA                                | NA        | NA                                                               | 22 (11.4)         | 50 (25.9)  | NA        | 13 (6.7)  | NA        |
| Jain et al. <sup>24</sup>     | 43 (68.3)          | NA               | 3 (4.8)  | 9 (14.3)  | NA                                | 2 (3.2)   | NA                                                               | 28 (44.4)         | 63 (100)   | 22 (34.9) | 16 (25.4) | 24 (38.1) |
| Amir et al. <sup>25</sup>     | NA                 | NA               | NA       | NA        | NA                                | NA        | NA                                                               | 15 (100)          | 4 (26.7)   | NA        | NA        | NA        |
| Nygaard et al. <sup>26</sup>  | NA                 | NA               | NA       | NA        | NA                                | NA        | Female 16, Male 97                                               | 11 (73.3)         | 15 (100)   | NA        | NA        | NA        |
| Chelala et al. <sup>27</sup>  | NA                 | NA               | NA       | NA        | NA                                | NA        | NA                                                               | NA                | NA         | NA        | NA        | NA        |
| Das et al. <sup>28</sup>      | 9 (36.0)           | 3 (12.0)         | 1 (4.0)  | 11 (44)   | 1 (4.0)                           | NA        | NA                                                               | 6 (24.0)          | 25 (100)   | 3 (12.0)  | 2 (8.0)   | 1 (4.0)   |
| Roh et al. <sup>29</sup>      | 0 (0)              | 0 (0)            | 40 (100) | 0 (0)     | 0 (0)                             | 0 (0)     | NA                                                               | NA                | 40 (100)   | 7 (17.5)  | NA        | NA        |
| Patel et al. <sup>30</sup>    | 6 (66.7)           | 1 (11.1)         | 0 (0)    | 0 (0)     | 0 (0)                             | 2 (22.2)  | NA                                                               | NA                | 9 (100)    | 4 (44.4)  | NA        | NA        |

| Author                        | Treatment, No. (%) |                |           |            | Laboratory values   |                       |                      |                        |                            |                         | Electrocardiography, No. (%) |                |          |
|-------------------------------|--------------------|----------------|-----------|------------|---------------------|-----------------------|----------------------|------------------------|----------------------------|-------------------------|------------------------------|----------------|----------|
|                               | NSAIDs             | Glucocorticoid | IVIG      | Colchicine | CRP (mg/dL)         | Elevated CRP, No. (%) | Troponin I, (ng/mL)  | Troponin T, (ng/mL)    | Elevated troponin, No. (%) | BNP (pg/mL)             | ST-elevation / depression    | T wave changes | NSVT     |
| Li et al. <sup>19</sup>       | NA                 | NA             | NA        | NA         | NA                  | NA                    | NA                   | NA                     | NA                         | NA                      | NA                           | NA             | NA       |
| Krug et al. <sup>20</sup>     | NA                 | NA             | NA        | NA         | NA                  | NA                    | NA                   | NA                     | NA                         | NA                      | NA                           | NA             | NA       |
| Mevorach et al. <sup>21</sup> | NA                 | NA             | NA        | NA         | NA                  | 12 (98)               | NA                   | NA                     | 13 (100)                   | NA                      | 5 (38.0)                     | 2 (15.0)       | 0 (0)    |
| Truong et al. <sup>22</sup>   | 113 (81.3)         | 30 (216%)      | 30 (21.6) | 11 (7.9)   | 3.3 (range 1.1-6.2) | NA                    | 8.1 (range 3.5-15.9) | 0.61 (range 0.25-1.30) | 139 (100)                  | 55.0 (range 18.9-147.0) | 95 (69.0)                    | NA             | 7 (5.1)  |
| Foltran et al. <sup>23</sup>  | NA                 | NA             | NA        | NA         | NA                  | NA                    | NA                   | NA                     | NA                         | NA                      | NA                           | NA             | NA       |
| Jain et al. <sup>24</sup>     | 54 (85.7)          | 15 (23.8)      | 17 (27)   | 4 (6.3)    | 37 ± 35             | 62 (98)               | 8.8 ± 9.1            | NA                     | 63 (100)                   | 94 ± 147                | 44 (70.0)                    | NA             | 3 (4.8)  |
| Amir et al. <sup>25</sup>     | NA                 | NA             | NA        | NA         | NA                  | NA                    | NA                   | NA                     | 14 (93)                    | NA                      | 13 (87.0)                    | NA             | NA       |
| Nygaard et al. <sup>26</sup>  | 9 (60.0)           | 1 (6.7)        | NA        | NA         | NA                  | 11 (73)               | NA                   | NA                     | 12 (80)                    | NA                      | 5 (33.0)                     | 3 (20.0)       | NA       |
| Chelala et al. <sup>27</sup>  | NA                 | NA             | NA        | 1 (20)     | NA                  | NA                    | 5.9 ± 4.3            | 0.33 ± 0.13            | 5 (100)                    | 206.5 ± 206.7           | 1 (20.0)                     | NA             | 1 (20.0) |
| Das et al. <sup>28</sup>      | 23 (92.0)          | 1 (4.0)        | 2 (8.0)   | NA         | NA                  | 17 (94.0)             | NA                   | NA                     | 25 (100)                   | NA                      | 19 (76.0)                    | 3 (12.0)       | 3 (12.0) |
| Roh et al. <sup>29</sup>      | 3 (77.5)           | 8 (40.0)       | 1 (2.5)   | 2 (5.0)    | 9.4 [1.6-50]        | NA                    | 0.01 [0.003-0.01]    | 0.003 [0.003-0.52]     | 5 (12.5)                   | NA                      | 7 (40.0)                     | NA             | NA       |
| Patel et al. <sup>30</sup>    | 8 (88.9)           | 0 (0)          | 1 (11.1)  | NA         | NA                  | NA                    | NA                   | NA                     | NA                         | NA                      | NA                           | NA             | NA       |

| Author                        | Echocardiography                                |                  |                                  | CMR                                 |                              |
|-------------------------------|-------------------------------------------------|------------------|----------------------------------|-------------------------------------|------------------------------|
|                               | LV systolic dysfunction (LVEF< 55%),<br>No. (%) | LVEF, %          | Pericardial effusion,<br>No. (%) | Timing of CMR after the onset,<br>d | Myocardial edema,<br>No. (%) |
| Li et al. <sup>19</sup>       | NA                                              | NA               | NA                               | NA                                  | NA                           |
| Krug et al. <sup>20</sup>     | NA                                              | NA               | NA                               | NA                                  | NA                           |
| Mevorach et al. <sup>21</sup> | 2 (15.0)                                        | NA               | 3 (23.0)                         | NA                                  | NA                           |
| Truong et al. <sup>22</sup>   | 26 (19.0)                                       | NA               | 1 (0.7)                          | 5 [3-17]                            | 54 (55.7)                    |
| Foltran et al. <sup>23</sup>  | NA                                              | NA               | NA                               | NA                                  | NA                           |
| Jain et al. <sup>24</sup>     | 9 (14.0)                                        | 60.9 ± 6.5       | NA                               | NA                                  | 50 (89.3)                    |
| Amir et al. <sup>25</sup>     | 2 (13.3)                                        | NA               | 2 (13.0)                         | 28 ± 21                             | 4 (26.7)                     |
| Nygaard et al. <sup>26</sup>  | 3 (20.0)                                        | NA               | 1 (6.7)                          | NA                                  | NA                           |
| Chelala et al. <sup>27</sup>  | 1 (20.0)                                        | NA               | NA                               | 5.8 ± 1.2                           | 5 (80.0)                     |
| Das et al. <sup>28</sup>      | 2 (8.0)                                         | NA               | 1 (4.0)                          | NA                                  | 6 (37.5)                     |
| Roh et al. <sup>29</sup>      | 6 (15.0)                                        | 65 ± 8.9         | 3 (7.5)                          | NA                                  | NA                           |
| Patel et al. <sup>30</sup>    | 2 (22.2)                                        | 59.7 [57.8-67.2] | 1 (11.1)                         | NA                                  | NA                           |

Numbers represent n (%) for categorical variables, and mean ± standard deviation (SD), median (interquartile range [IQR]) for continuous variables.

Abbreviation: ECMO, extracorporeal membrane oxygenation; ICU, intensive care unit; IVIG, intravenous immune globulin; J&J, Johnson & Johnson; LGE, Late gadolinium enhancement; LV, left ventricular; LVEDV, Left ventricle end-diastolic volume; LVEF, left ventricle ejection fraction; NA, not available; NSAIDs, Non-steroidal anti-inflammatory drugs; NSVT, Non-sustained ventricular tachycardia; WBC, white blood cell

**eTable 4.** Characteristics of Case Series Included

| Author                        | Year | Country | Number of patients | Age | Sex | BMI  | Ethnicity | Vaccine type               | Dose of vaccine with symptoms | Onset of symptoms after vaccine (days) | Duration of symptoms (days) | History of COVID-19 | Comorbidity                                                       |
|-------------------------------|------|---------|--------------------|-----|-----|------|-----------|----------------------------|-------------------------------|----------------------------------------|-----------------------------|---------------------|-------------------------------------------------------------------|
| Puchalski et al <sup>31</sup> | 2022 | Poland  | 5                  | 15  | M   | 27   | NA        | BNT162b2 (Pfizer-BioNTech) | 2                             | 2                                      | 3                           | NA                  | Obesity                                                           |
|                               |      |         |                    | 17  | M   | 25.8 | NA        | BNT162b2 (Pfizer-BioNTech) | 2                             | 2                                      | 3                           | NA                  | Obesity                                                           |
|                               |      |         |                    | 17  | M   | 30   | NA        | BNT162b2 (Pfizer-BioNTech) | 1                             | 2                                      | 4                           | NA                  | Obesity                                                           |
|                               |      |         |                    | 17  | M   | 30   | NA        | BNT162b2 (Pfizer-BioNTech) | 1                             | 3                                      | 4                           | NA                  | Obesity                                                           |
|                               |      |         |                    | 17  | M   | 24.8 | NA        | BNT162b2 (Pfizer-BioNTech) | 1                             | 23                                     | 6                           | NA                  | Overweight                                                        |
| Manfredi et al. <sup>32</sup> | 2022 | Italy   | 5                  | 17  | F   | NA   | NA        | BNT162b2 (Pfizer-BioNTech) | 2                             | NA                                     | NA                          | NA                  | AVRT                                                              |
|                               |      |         |                    | 18  | M   | NA   | NA        | BNT162b2 (Pfizer-BioNTech) | 2                             | NA                                     | NA                          | NA                  | RBBB                                                              |
|                               |      |         |                    | 16  | F   | NA   | NA        | MRNA-1273 (Moderna)        | 2                             | NA                                     | NA                          | NA                  | None                                                              |
|                               |      |         |                    | 15  | M   | NA   | NA        | BNT162b2 (Pfizer-BioNTech) | 2                             | NA                                     | NA                          | NA                  | None                                                              |
|                               |      |         |                    | 14  | M   | NA   | NA        | BNT162b2 (Pfizer-BioNTech) | 2                             | NA                                     | NA                          | NA                  | None                                                              |
| Ambati et al. <sup>33</sup>   | 2021 | US      | 2                  | 16  | M   | NA   | NA        | BNT162b2 (Pfizer-BioNTech) | 2                             | 2                                      | 1                           | No                  | von Willebrand disease, anxiety disorder, Lennox-Gastaut syndrome |

|                               |      |    |   |      |   |      |                 |                            |     |   |    |     |                                                                    |
|-------------------------------|------|----|---|------|---|------|-----------------|----------------------------|-----|---|----|-----|--------------------------------------------------------------------|
|                               |      |    |   | 17   | M | NA   | NA              | BNT162b2 (Pfizer-BioNTech) | 2   | 3 | NA | No  | Attention deficit hyperactivity disorder, mild intermittent asthma |
| Tano et al. <sup>34</sup>     | 2021 | US | 8 | 17.6 | M | 24.2 | White, Hispanic | BNT162b2 (Pfizer-BioNTech) | 2   | 4 | NA | yes | Vitiligo                                                           |
|                               |      |    |   | 16.7 | M | 25.1 | White, Hispanic | BNT162b2 (Pfizer-BioNTech) | 2   | 3 | NA | no  | None                                                               |
|                               |      |    |   | 17.2 | M | 39.7 | White, Hispanic | BNT162b2 (Pfizer-BioNTech) | 1&2 | 3 | NA | no  | Myocarditis                                                        |
|                               |      |    |   | 15.9 | M | 16.8 | White, Hispanic | BNT162b2 (Pfizer-BioNTech) | 1   | 2 | NA | yes | Marfan syndrome                                                    |
|                               |      |    |   | 16.6 | M | 30.8 | White, Hispanic | BNT162b2 (Pfizer-BioNTech) | 2   | 1 | NA | no  | None                                                               |
|                               |      |    |   | 15.8 | M | 29.5 | White, Hispanic | BNT162b2 (Pfizer-BioNTech) | 2   | 2 | NA | no  | Insulin resistance, dyslipidemia                                   |
|                               |      |    |   | 15.2 | M | 17.3 | White, Hispanic | BNT162b2 (Pfizer-BioNTech) | 2   | 3 | NA | no  | None                                                               |
|                               |      |    |   | 17.2 | M | NA   | White, Hispanic | BNT162b2 (Pfizer-BioNTech) | 2   | 1 | NA | no  | None                                                               |
| Park et al. <sup>35</sup>     | 2022 | US | 2 | 15   | M | NA   | Asian/Filipino  | BNT162b2 (Pfizer-BioNTech) | 1   | 3 | 1  | NA  | NA                                                                 |
|                               |      |    |   | 16   | M | NA   | Asian/Filipino  | BNT162b2 (Pfizer-BioNTech) | 2   | 2 | 1  | NA  | NA                                                                 |
| Marshall et al. <sup>36</sup> | 2021 | US | 7 | 16   | M | NA   | NA              | BNT162b2 (Pfizer-BioNTech) | 2   | 2 | NA | No  | None                                                               |
|                               |      |    |   | 19   | M | NA   | NA              | BNT162b2 (Pfizer-BioNTech) | 2   | 3 | NA | No  | None                                                               |



|                                      |      |        |                       |    |   |    |    |                            |   |    |    |    |      |
|--------------------------------------|------|--------|-----------------------|----|---|----|----|----------------------------|---|----|----|----|------|
|                                      |      |        |                       | 17 | M | NA | NA | BNT162b2 (Pfizer-BioNTech) | 2 | 2  | NA | No | None |
|                                      |      |        |                       | 18 | M | NA | NA | BNT162b2 (Pfizer-BioNTech) | 2 | 3  | NA | No | None |
|                                      |      |        |                       | 17 | M | NA | NA | BNT162b2 (Pfizer-BioNTech) | 2 | 3  | NA | No | None |
|                                      |      |        |                       | 16 | M | NA | NA | BNT162b2 (Pfizer-BioNTech) | 2 | 3  | 1  | No | None |
|                                      |      |        |                       | 14 | M | NA | NA | BNT162b2 (Pfizer-BioNTech) | 2 | 2  | 4  | No | None |
| Starekova et al. <sup>37</sup>       | 2021 | US     | 2 (3 of 5 are adults) | 17 | M | NA | NA | BNT162b2 (Pfizer-BioNTech) | 2 | 2  | NA | NA | NA   |
|                                      |      |        |                       | 18 | M | NA | NA | BNT162b2 (Pfizer-BioNTech) | 2 | 3  | NA | NA | NA   |
| Łażniak-Pfajfer et al. <sup>38</sup> | 2022 | Poland | 3                     | 17 | M | NA | NA | BNT162b2 (Pfizer-BioNTech) | 1 | 8  | NA | NA | NA   |
|                                      |      |        |                       | 17 | M | NA | NA | BNT162b2 (Pfizer-BioNTech) | 1 | 10 | NA | NA | NA   |
|                                      |      |        |                       | 17 | M | NA | NA | BNT162b2 (Pfizer-BioNTech) | 2 | 1  | NA | NA | NA   |
| Meyer-Szary et al. <sup>39</sup>     | 2021 | Poland | 2                     | 12 | M | NA | NA | BNT162b2 (Pfizer-BioNTech) | 2 | 2  | NA | No | NA   |
|                                      |      |        |                       | 17 | M | NA | NA | BNT162b2 (Pfizer-BioNTech) | 2 | 1  | NA | No | NA   |
| Ahmed et al. <sup>40</sup>           | 2022 | Iraq   | 3                     | 19 | M | NA | NA | MRNA-1273 (Moderna)        | 2 | 2  | NA | No | NA   |
|                                      |      |        |                       | 16 | M | NA | NA | BNT162b2 (Pfizer-BioNTech) | 2 | 4  | NA | No | NA   |

|                                |                                                              |         |   | 17                                                 | M | NA                    | NA        | BNT162b2 (Pfizer-BioNTech) | 2               | 2                              | NA                              | No               | NA                                   |
|--------------------------------|--------------------------------------------------------------|---------|---|----------------------------------------------------|---|-----------------------|-----------|----------------------------|-----------------|--------------------------------|---------------------------------|------------------|--------------------------------------|
| Freise et al. <sup>41</sup>    | 2022                                                         | Germany | 2 | 13                                                 | M | NA                    | Caucasian | BNT162b2 (Pfizer-BioNTech) | 2               | 3                              | 5                               | NA               | No                                   |
|                                |                                                              |         |   | 15                                                 | F | NA                    | Caucasian | BNT162b2 (Pfizer-BioNTech) | 2               | 3                              | 5                               | NA               | Limb girdle muscle dystrophy type 2D |
| Author                         | Symptoms                                                     |         |   | Outcomes                                           |   | Length of stay (days) | Treatment |                            | Vital Signs     |                                |                                 |                  |                                      |
|                                |                                                              |         |   |                                                    |   |                       |           |                            | Temperature (C) | Systolic blood pressure (mmHg) | Diastolic blood Pressure (mmHg) | Heart rate (bpm) |                                      |
| Puchalski et al. <sup>31</sup> | Chest pain, fever                                            |         |   | Discharge                                          |   | 10                    | NA        |                            | NA              | NA                             | NA                              | NA               | NA                                   |
|                                | Chest pain, fever, shoulder pain at injection site, diarrhea |         |   | Discharge                                          |   | 13                    | NA        |                            | NA              | NA                             | NA                              | NA               | NA                                   |
|                                | Chest pain, fever, cough                                     |         |   | Discharge                                          |   | 16                    | NA        |                            | NA              | NA                             | NA                              | NA               | NA                                   |
|                                | Chest pain                                                   |         |   | Discharge                                          |   | 12                    | NA        |                            | NA              | NA                             | NA                              | NA               | NA                                   |
|                                | Chest pain, sore throat, fever                               |         |   | Discharge                                          |   | 11                    | NA        |                            | NA              | NA                             | NA                              | NA               | NA                                   |
| Manfredi et al. <sup>32</sup>  | NA                                                           |         |   | Hospitalization                                    |   | NA                    | NA        |                            | 37.1            | 110                            | 70                              | NA               | NA                                   |
|                                | NA                                                           |         |   | Hospitalization                                    |   | NA                    | NA        |                            | 38.2            | 120                            | 80                              | NA               | NA                                   |
|                                | NA                                                           |         |   | Hospitalization                                    |   | NA                    | NA        |                            | 37.6            | 125                            | 65                              | NA               | NA                                   |
|                                | NA                                                           |         |   | Hospitalization                                    |   | NA                    | NA        |                            | 38.3            | 115                            | 67                              | NA               | NA                                   |
|                                | NA                                                           |         |   | Hospitalization                                    |   | NA                    | NA        |                            | 37.7            | 123                            | 70                              | NA               | NA                                   |
| Ambati et al. <sup>33</sup>    | Chest pain, vomiting                                         |         |   | Admitted to PICU for close monitoring<br>Discharge |   | 3                     | NSAIDs    |                            | NA              | NA                             | NA                              | NA               | NA                                   |

|                               |                                                                       |                                                        |    |                                                               |      |     |    |     |
|-------------------------------|-----------------------------------------------------------------------|--------------------------------------------------------|----|---------------------------------------------------------------|------|-----|----|-----|
|                               | Chest pain, fatigue, headache, fever, arthralgia, shortness of breath | Admitted to the PICU for close monitoring<br>Discharge | 3  | NSAIDs                                                        | NA   | NA  | NA | NA  |
| Tano et al. <sup>34</sup>     | NA                                                                    | Discharge                                              | 2  | NSAIDs                                                        | NA   | NA  | NA | NA  |
|                               | NA                                                                    | Discharge                                              | 3  | NSAIDs                                                        | NA   | NA  | NA | NA  |
|                               | NA                                                                    | Discharge                                              | 4  | NSAIDs, IVIG                                                  | NA   | NA  | NA | NA  |
|                               | NA                                                                    | Discharge                                              | 3  | None                                                          | NA   | NA  | NA | NA  |
|                               | NA                                                                    | Discharge                                              | 3  | None                                                          | NA   | NA  | NA | NA  |
|                               | NA                                                                    | Discharge                                              | 2  | None                                                          | NA   | NA  | NA | NA  |
|                               | NA                                                                    | Discharge                                              | 3  | NSAIDs                                                        | NA   | NA  | NA | NA  |
|                               | NA                                                                    | Discharge                                              | 4  | NSAIDs                                                        | NA   | NA  | NA | NA  |
| Park et al. <sup>35</sup>     | Chest pain                                                            | Discharge                                              | NA | NA                                                            | 37.2 | 119 | 72 | 116 |
|                               | Chest pain                                                            | Discharge                                              | NA | NA                                                            | 37.2 | 132 | 91 | 108 |
| Marshall et al. <sup>36</sup> | Chest pain, fatigue, poor appetite, fever, arm pain                   | Hospitalization<br>Discharge                           | 6  | NSAID, IVIg, IV methylprednisolone, PO prednisone, famotidine | NA   | NA  | NA | NA  |
|                               | Chest pain, fatigue, weakness, subjective low-grade fever             | Hospitalization<br>Discharge                           | 2  | NSAID, colchicine, aspirin                                    | NA   | NA  | NA | NA  |
|                               | Chest pain, arm pain, paresthesia,                                    | Hospitalization<br>Discharge                           | 2  | NSAID, famotidine                                             | NA   | NA  | NA | NA  |
|                               | Chest pain, malaise, arthralgia/myalgia, subjective fever             | Hospitalization<br>Discharge                           | 3  | NSAID, IVIG, IV methylprednisolone, PO prednisone             | NA   | NA  | NA | NA  |

|                                      |                                                                            |                                       |    |                                                            |      |     |    |    |
|--------------------------------------|----------------------------------------------------------------------------|---------------------------------------|----|------------------------------------------------------------|------|-----|----|----|
|                                      | Chest pain, sore throat, headache, dry cough, body aches, subjective fever | Hospitalization<br>Discharge          | NA | NSAID, IVIG, IV methylprednisolone, PO prednisone, aspirin | NA   | NA  | NA | NA |
|                                      | Chest pain, malaise, subjective fever                                      | Hospitalization<br>Discharge          | 3  | IVIG, PO prednisone                                        | NA   | NA  | NA | NA |
|                                      | Chest pain, shortness of breath, fever                                     | LFNC,<br>hospitalization<br>Discharge | 4  | NSAID, famotidine, furosemide                              | NA   | NA  | NA | NA |
| Starekova et al. <sup>37</sup>       | Subjective mild fever, chills, malaise, nausea, chest pain                 | Hospitalization                       | NA | NA                                                         | NA   | NA  | NA | NA |
|                                      | Subjective mild fever, chills, malaise, chest pain, nausea                 | Hospitalization                       | NA | NA                                                         | NA   | NA  | NA | NA |
| Łażniak-Pfajfer et al. <sup>38</sup> | Chest pain, arm pain, diarrhea                                             | Hospitalization<br>Discharge          | NA | NA                                                         | NA   | NA  | NA | NA |
|                                      | Chest pain, fever, tachycardia, weakness                                   | Hospitalization<br>Discharge          | NA | NA                                                         | NA   | NA  | NA | NA |
|                                      | Chest pain, fever                                                          | Hospitalization<br>Discharge          | NA | NA                                                         | NA   | NA  | NA | NA |
| Meyer-Szary et al. <sup>39</sup>     | Chest pain, fever, diarrhea                                                | Hospitalization<br>Discharge          | 5  | Acetaminophen                                              | NA   | NA  | NA | NA |
|                                      | Chest pain                                                                 | Hospitalization<br>Discharge          | 5  | Acetaminophen                                              | NA   | NA  | NA | NA |
| Ahmed et al. <sup>40</sup>           | Chest pain, fatigue                                                        | Hospitalization<br>Discharge          | NA | NSAIDs                                                     | 36.5 | 115 | 80 | 68 |
|                                      | Chest pain, chills, fatigue                                                | Hospitalization<br>Discharge          | NA | NSAIDs                                                     | 36.7 | 122 | 76 | 81 |
|                                      | Chest pain, fever, fatigue                                                 | Hospitalization<br>Discharge          | NA | NSAIDs                                                     | 37.2 | 126 | 68 | 82 |

|                                |                   |                    |                    |                    |             |                                                                  |                           |                                             |    |            |           |          |                       |
|--------------------------------|-------------------|--------------------|--------------------|--------------------|-------------|------------------------------------------------------------------|---------------------------|---------------------------------------------|----|------------|-----------|----------|-----------------------|
| Freise et al. <sup>41</sup>    | Chest pain        |                    |                    |                    |             | Hospitalization                                                  | 7                         | NA                                          | NA | NA         | NA        | NA       |                       |
|                                | Chest pain        |                    |                    |                    |             | Discharge                                                        |                           |                                             |    |            |           |          |                       |
| Author                         | Laboratory values |                    |                    |                    |             | Electrocardiography                                              | Echocardiography findings |                                             |    | CMR        |           |          |                       |
|                                | CRP (mg/dL)       | Troponin I (ng/mL) | Troponin T (ng/mL) | NT-pro BNP (pg/mL) | BNP (pg/mL) |                                                                  | LVEF (%)                  | Other findings                              |    | LVEDD (mm) | LVED (mL) | LVEF (%) | Abnormal findings     |
| Puchalski et al. <sup>31</sup> | 3                 | 14218.4            | NA                 | 269                | NA          | ST elevation in I, II, V5–V6, ST depression in V1–V2             | 64                        | Normal wall motion, no pericardial effusion |    | 54.4       | NA        | NA       | Myocardial edema, LGE |
|                                | 3.9               | 37279.6            | NA                 | 27                 | NA          | ST elevation in II, III, aVF, V5–V6                              | 72                        | Normal wall motion, no pericardial effusion |    | 47-50      | NA        | NA       | Myocardial edema, LGE |
|                                | 3.9               | 10450.3            | NA                 | 50                 | NA          | ST elevation in V3–V4, Negative T wave in I–III, aVL, aVF, V4–V6 | 61                        | Normal wall motion, no pericardial effusion |    | 47 - 50    | NA        | NA       | Myocardial edema, LGE |
|                                | 0.7               | 1895.2             | NA                 | 259                | NA          | ST elevation in II, III, aVF                                     | 62                        | Normal wall motion, no pericardial effusion |    | 56.2       | NA        | NA       | Myocardial edema, LGE |
|                                | 40                | 1674               | NA                 | 391                | NA          | ST elevation in V4–V6                                            | 68                        | Normal wall motion, no pericardial effusion |    | 55         | NA        | NA       | Myocardial edema, LGE |
| Manfredi et al. <sup>32</sup>  | 2.2               | 439                | NA                 | NA                 | 73          | NA                                                               | NA                        | NA                                          | NA | 67         | 55        | LGE      |                       |
|                                | 4.3               | 8123               | NA                 | NA                 | 57          | NA                                                               | NA                        | NA                                          | NA | 75         | 65        | LGE      |                       |
|                                | 3.5               | 576                | NA                 | NA                 | 76          | NA                                                               | NA                        | NA                                          | NA | 62         | 62        | LGE      |                       |
|                                | 4.5               | 4070               | NA                 | NA                 | 58          | NA                                                               | NA                        | NA                                          | NA | 67         | 60        | LGE      |                       |
|                                | 2.7               | 676                | NA                 | NA                 | 45          | NA                                                               | NA                        | NA                                          | NA | 65         | 67        | LGE      |                       |

|                             |     |      |    |     |    |                                                            |    |                                                                              |    |    |    |                       |
|-----------------------------|-----|------|----|-----|----|------------------------------------------------------------|----|------------------------------------------------------------------------------|----|----|----|-----------------------|
| Ambati et al. <sup>33</sup> | 8.7 | 38   | NA | NA  | NA | Diffuse ST segment elevations                              | NA | Normal biventricular systolic function with normal coronary origins and size | NA | NA | NA | NA                    |
|                             | 9.5 | 5    | NA | NA  | NA | ST elevation                                               | NA | Mildly decreased left, ventricular systolic function                         | NA | NA | NA | NA                    |
| Tano et al. <sup>34</sup>   | NA  | 4.9  | NA | NA  | NA | Abnormal T waves, ST-segment depression                    | 56 | No pericardial effusion                                                      | NA | NA | NA | NA                    |
|                             | NA  | 5.6  | NA | NA  | NA | PR depression, diffuse ST elevation                        | 55 | No pericardial effusion                                                      | NA | NA | 60 | Myocardial edema, LGE |
|                             | NA  | 34.5 | NA | NA  | NA | PR depression, diffuse ST elevation                        | 58 | No pericardial effusion                                                      | NA | NA | 61 | Myocardial edema, LGE |
|                             | NA  | 11.8 | NA | NA  | NA | Normal sinus rhythm                                        | 57 | No pericardial effusion                                                      | NA | NA | 61 | Myocardial edema, LGE |
|                             | NA  | 2.4  | NA | NA  | NA | Diffuse ST elevation                                       | 60 | No pericardial effusion                                                      | NA | NA | NA | NA                    |
|                             | NA  | 5.1  | NA | NA  | NA | Normal sinus rhythm                                        | 62 | No pericardial effusion                                                      | NA | NA | NA | NA                    |
|                             | NA  | 22.1 | NA | NA  | NA | Intraventricular conduction delay, transient ST depression | 60 | No pericardial effusion                                                      | NA | NA | NA | NA                    |
|                             | NA  | 5.1  | NA | NA  | NA | Mild diffuse ST elevation                                  | 61 | No pericardial effusion                                                      | NA | NA | NA | NA                    |
| Park et al. <sup>35</sup>   | 1.9 | 3.4  | NA | 108 | NA | ST elevation, left axis deviation                          | 63 | Increased patchy echogenicity of the myocardium                              | NA | NA | NA | NA                    |
|                             | 2.4 | 4.3  | NA | 325 | NA | ST elevation, T wave inversion                             | 60 | None                                                                         | NA | NA | NA | EGE of myocardium     |

|                                      |      |              |                                    |     |       |                                                                           |    |                                                     |         |    |    |                                                 |
|--------------------------------------|------|--------------|------------------------------------|-----|-------|---------------------------------------------------------------------------|----|-----------------------------------------------------|---------|----|----|-------------------------------------------------|
| Marshall et al. <sup>36</sup>        | 1.0  | 2.6          | NA                                 | 428 | NA    | Atrioventricular dissociation with junctional escape rhythm, ST elevation | NA | Normal                                              | NA      | NA | NA | LGE, myocardial edema, left axillary adenopathy |
|                                      | 6.7  | NA           | (High sensitivity Troponin T: 232) | NA  | NA    | ST elevation (diffuse)                                                    | NA | Normal                                              | NA      | NA | NA | LGE, myocardial edema                           |
|                                      | 2.5  | 5.55         | NA                                 | 376 | NA    | ST elevation (diffuse), T-wave abnormality                                | NA | Borderline basal lateral and basal posterior strain | NA      | NA | NA | LGE, myocardial edema                           |
|                                      | 12.7 | NA           | 1.09                               | NA  | NA    | ST elevation in I, II, V5–V6, ST depression in V1–V2                      | 64 | Normal wall motion, no pericardial effusion         | 54.4    | NA | NA | Myocardial edema, LGE                           |
|                                      | 18.1 | 3.2          | NA                                 | 987 | NA    | ST elevation in II, III, aVF, V5–V6                                       | 72 | Normal wall motion, no pericardial effusion         | 47-50   | NA | NA | Myocardial edema, LGE                           |
|                                      | 1.5  | NA           | 0.66                               | 149 | NA    | ST elevation in V3–V4, Negative T wave in I–III, aVL, aVF, V4–V6          | 61 | Normal wall motion, no pericardial effusion         | 47 - 50 | NA | NA | Myocardial edema, LGE                           |
|                                      | 7.7  | 22.1         | NA                                 | NA  | 107.9 | ST elevation in II, III, aVF                                              | 62 | Normal wall motion, no pericardial effusion         | 56.2    | NA | NA | Myocardial edema, LGE                           |
| Starekova et al. <sup>37</sup>       | NA   | 14.65 (peak) | NA                                 | NA  | NA    | ST elevation in V4–V6                                                     | 68 | Normal wall motion, no pericardial effusion         | 55      | NA | NA | Myocardial edema, LGE                           |
|                                      | NA   | 4 (peak)     | NA                                 | NA  | 38    | NA                                                                        | NA | NA                                                  | NA      | 67 | 55 | LGE                                             |
| Łażniak-Pfajfer et al. <sup>38</sup> | NA   | 5.3          | NA                                 | NA  | NA    | NA                                                                        | NA | NA                                                  | NA      | 75 | 65 | LGE                                             |
|                                      | NA   | 16.3         | NA                                 | NA  | NA    | NA                                                                        | NA | NA                                                  | NA      | 62 | 62 | LGE                                             |
|                                      | NA   | 16.9         | NA                                 | NA  | NA    | NA                                                                        | NA | NA                                                  | NA      | 67 | 60 | LGE                                             |

|                                  |             |            |      |     |    |                               |    |                                                                              |    |    |    |                                                   |
|----------------------------------|-------------|------------|------|-----|----|-------------------------------|----|------------------------------------------------------------------------------|----|----|----|---------------------------------------------------|
| Meyer-Szary et al. <sup>39</sup> | 23 (peak)   | 5.1 (peak) | NA   | NA  | NA | NA                            | NA | NA                                                                           | NA | 65 | 67 | LGE                                               |
|                                  | 18.2 (peak) | 8.9 (peak) | NA   | NA  | NA | Diffuse ST segment elevations | NA | Normal biventricular systolic function with normal coronary origins and size | NA | NA | NA | NA                                                |
| Ahmed et al. <sup>40</sup>       | NA          | NA         | NA   | NA  | NA | ST-changes                    | 65 | NA                                                                           | NA | NA | NA | NA                                                |
|                                  | NA          | NA         | NA   | NA  | NA | ST-changes                    | 57 | NA                                                                           | NA | NA | NA | NA                                                |
|                                  | NA          | NA         | NA   | NA  | NA | ST-changes                    | 61 | NA                                                                           | NA | NA | NA | NA                                                |
| Freise et al. <sup>41</sup>      | NA          | 150        | NA   | 520 | NA | NA                            | NA | NA                                                                           | NA | NA | NA | NA                                                |
|                                  | NA          | NA         | 1438 | 300 | NA | NA                            | NA | NA                                                                           | NA | NA | NA | Myocarditis with edema and elevated T2-relaxation |

Abbreviations: AVRT, atrioventricular reentrant tachycardia; BMI, body mass index; CRP, C-reactive protein; EGE, early gadolinium enhancement; ICU, intensive care unit; IVIG, intravenous immune globulin; LGE, late gadolinium enhancement; LV, left ventricular; LVEDD, left ventricle end-diastolic diameter; LVEDV, left ventricle end-diastolic volume; LVEF, left ventricle ejection fraction; NA, not available; NSAIDS, non-steroidal anti-inflammatory drugs; PCT, procalcitonin; PO, Per os; RBBB, right bundle branch block; VT, ventricular tachycardia; WBC, white blood cell



**eTable 5.** Definition of Myocarditis

| Author                        | Definition of myocarditis                                                                                                                                                                                                                                                                                                                                                                                                                                  |
|-------------------------------|------------------------------------------------------------------------------------------------------------------------------------------------------------------------------------------------------------------------------------------------------------------------------------------------------------------------------------------------------------------------------------------------------------------------------------------------------------|
| Li et al. <sup>19</sup>       | International Classification of Diseases, Ninth Revision, Clinical Modification (422.x and 429.0)                                                                                                                                                                                                                                                                                                                                                          |
| Krug et al. <sup>20</sup>     | The Centers for Disease Control and Prevention working definition for probable acute myocarditis, new or worsening symptoms plus at least one abnormal laboratory or clinical finding (e.g., elevated troponin; electrocardiogram (EKG), echocardiogram (ECHO), or cardiac MRI (cMRI)) consistent with myo/pericarditis. Exclusions were made for lack of objective laboratory find                                                                        |
| Mevorach et al. <sup>21</sup> | Clinical data that involved International Classification of Diseases, 10th Revision, 422.0-9x and 429.0x codes were reviewed by a cardiologist and a rheumatologist, and the severity of disease was classified according to the Brighton Collaboration Case Definition for myocarditis                                                                                                                                                                    |
| Truong et al. <sup>22</sup>   | Centers for Disease Control and Prevention Case Definitions for Probable and Confirmed Cases of COVID-19 Vaccine-Associated Myocarditis. Lake Louise criteria were used for cardiac MRI findings.                                                                                                                                                                                                                                                          |
| Foltran et al. <sup>23</sup>  | NA                                                                                                                                                                                                                                                                                                                                                                                                                                                         |
| Jain et al. <sup>24</sup>     | The 2009 Lake Louise criteria or, when parametric mapping was available, the 2018 revised Lake Louise CMR criteria were used to test for a diagnosis of acute myocarditis.                                                                                                                                                                                                                                                                                 |
| Amir et al. <sup>25</sup>     | Myocarditis was defined clinically, based on the presence of two or more of the following: (1) signs and symptoms of acute myocardial involvement (e.g., chest pain, arrhythmia); (2) elevated troponin; (3) echocardiographic evidence of ventricular dysfunction without an alternative explanation; and (4) (ST-T) changes in the ECG.<br>The 2009 Lake Louise criteria or the 2018 revised Lake Louise CMR criteria were used for cardiac MRI findings |
| Nygaard et al. <sup>26</sup>  | NA                                                                                                                                                                                                                                                                                                                                                                                                                                                         |
| Chelala et al. <sup>27</sup>  | NA                                                                                                                                                                                                                                                                                                                                                                                                                                                         |
| Das et al. <sup>28</sup>      | The Centers for Disease Control and Prevention criteria for myopericarditis.                                                                                                                                                                                                                                                                                                                                                                               |
| Roh et al. <sup>29</sup>      | We included patients with chest pain, pressure, chest discomfort, dyspnea, shortness of breath, palpitation or syncope after COVID-19 vaccination. We excluded patients with cardiac symptoms unrelated to COVID-19 vaccination or those that occurred 30 days after the COVID-19 vaccine.                                                                                                                                                                 |
| Patel et al. <sup>30</sup>    | The COVID-19 vaccine-related group consisted of patients with myocarditis after the vaccine, with no other etiology of myocarditis identified.                                                                                                                                                                                                                                                                                                             |

Abbreviations: CMR, cardiac magnetic resonance; NA, not available

**eTable 6.** Pooled Estimates for Clinical Characteristics and Outcomes From Subgroup Analyses Including Studies With Patients With Myocarditis

|                                           | Pooled estimates<br>(95% CI) | $I^2$ (%) | P value for<br>heterogeneity |
|-------------------------------------------|------------------------------|-----------|------------------------------|
| Age, years                                | 15.9 [15.6-16.3]             | 84.4      | <0.001                       |
| Male, %                                   | 89.9 [85.7-94.2]             | 46.9      | 0.058                        |
| History of COVID-19, %                    | 4.1 [0.5-7.7]                | 33.4      | 0.212                        |
| <b>Dose of vaccination:</b>               |                              |           |                              |
| 1 <sup>st</sup> dose, %                   | 16.7 [8.3-25.1]              | 89.7      | <0.001                       |
| 2 <sup>nd</sup> dose, %                   | 76.1 [58.5-93.6]             | 97.8      | <0.001                       |
| <b>Type of vaccine:</b>                   |                              |           |                              |
| BNT162b2 (Pfizer-BioNTech)                | 96.8 [95.3-98.3]             | 0         | 0.530                        |
| mRNA-1273 (Moderna)                       | 3.0 [1.5-4.4]                | 0         | 0.720                        |
| Days from vaccination to symptom onset, n | 2.5 [1.8-3.2]                | 91.0      | <0.001                       |
| <b>Symptoms:</b>                          |                              |           |                              |
| Chest pain, %                             | 79.3 [66.1-92.6]             | 98.9      | <0.001                       |
| Fever, %                                  | 43.0 [9.3-76.8]              | 98.7      | <0.001                       |
| Headache, %                               | 14.9 [5.2-24.7]              | 86.4      | <0.001                       |
| Dyspnea/ Respiratory distress, %          | 27.8 [20.8-34.7]             | 26.1      | 0.248                        |
| Myalgia, %                                | 25.3 [1.4-49.2]              | 92.3      | <0.001                       |
| <b>Treatment:</b>                         |                              |           |                              |
| NSAIDs                                    | 79.1 [71.6-86.6]             | 46.6      | 0.095                        |
| Glucocorticoid                            | 17.2 [11.2-23.1]             | 34.4      | 0.179                        |
| IVIg                                      | 13.0 [3.2-22.8]              | 83.2      | <0.001                       |
| Colchicine                                | 7.3 [4.1-10.4]               | 0         | 0.622                        |
| <b>Laboratory values:</b>                 |                              |           |                              |
| Elevated troponin I, %                    | 84.4 [74.0-94.8]             | 97.8      | <0.001                       |
| <b>Electrocardiography:</b>               |                              |           |                              |
| ST-segment elevation or changes, %        | 50.6 [30.2-71.0]             | 92.1      | <0.001                       |
| T-wave changes, %                         | 16.0 [1.6-30.3]              | 0         | 0.029                        |
| Non-sustained VT, %                       | 4.9 [2.1-7.8]                | 0         | 0.851                        |
| <b>Echocardiography:</b>                  |                              |           |                              |
| LVEF, %                                   | 62.1 [59.1-65.1]             | 71.2      | 0.031                        |

|                                       |                  |      |        |
|---------------------------------------|------------------|------|--------|
| LV Systolic dysfunction (LVEF<55%), % | 16.9 [12.6-21.2] | 0    | 0.981  |
| Mild (LVEF 45-54%), %                 | 15.3 [11.0-19.5] | 0    | 0.999  |
| Moderate (LVEF 35-44%), %             | 1.3 [0-2.6]      | 0    | 0.960  |
| Severe (LVEF <35%), %                 | 1.3 [0-2.6]      | 0    | 0.903  |
| Pericardial effusion, %               | 5.5 [0.1-11.0]   | 46.2 | 0.098  |
| <b>Cardiac magnetic resonance:</b>    |                  |      |        |
| Presence of LGE, %                    | 85.6 [77.3-94.0] | 52.8 | 0.095  |
| Myocardial edema, %                   | 62.9 [35.8-90.0] | 93.2 | <0.001 |
| <b>Outcome:</b>                       |                  |      |        |
| Hospitalization, %                    | 94.4 [89.3-99.4] | 63.2 | 0.018  |
| ICU admission, %                      | 23.8 [12.4-35.2] | 77.2 | <0.001 |
| Inotropes, %                          | 1.3 [0-2.7]      | 0    | 0.930  |
| Hospital length of stay, d            | 2.6 [1.8-3.3]    | 92.4 | <0.001 |

Abbreviations: ICU, intensive care unit; IVIG, intravenous immune globulin; LGE, late gadolinium enhancement; LV, left ventricular; LVEF, left ventricle ejection fraction; NSAIDS, Non-steroidal anti-inflammatory drugs; VT, ventricular tachycardia.

**eTable 7.** Joanna Briggs Institute Critical Appraisal Checklist for Prevalence Studies

|                               | Item1 | Item2 | Item3 | Item4          | Item5 | Item6 | Item7 | Item8 | Item9 |
|-------------------------------|-------|-------|-------|----------------|-------|-------|-------|-------|-------|
| Li et al. <sup>19</sup>       | Yes   | Yes   | Yes   | Not applicable | Yes   | Yes   | Yes   | Yes   | Yes   |
| Krug et al. <sup>20</sup>     | Yes   | Yes   | Yes   | Not applicable | Yes   | Yes   | Yes   | Yes   | Yes   |
| Mevorach et al. <sup>21</sup> | Yes   | Yes   | Yes   | Not applicable | Yes   | Yes   | Yes   | Yes   | Yes   |
| Truong et al. <sup>22</sup>   | Yes   | Yes   | Yes   | Not applicable | Yes   | Yes   | Yes   | Yes   | Yes   |
| Foltran et al. <sup>23</sup>  | Yes   | Yes   | Yes   | Not applicable | Yes   | No    | Yes   | Yes   | Yes   |
| Jain et al. <sup>24</sup>     | Yes   | Yes   | Yes   | Not applicable | Yes   | Yes   | Yes   | Yes   | Yes   |
| Amir et al. <sup>25</sup>     | Yes   | Yes   | Yes   | Not applicable | Yes   | Yes   | Yes   | Yes   | Yes   |
| Nygaard et al. <sup>26</sup>  | Yes   | Yes   | Yes   | Not applicable | Yew   | No    | Yes   | Yes   | Yes   |
| Chelala et al. <sup>27</sup>  | Yes   | Yes   | No    | Not applicable | Yes   | No    | Yes   | Yes   | Yes   |
| Das et al. <sup>28</sup>      | Yes   | Yes   | Yes   | Not applicable | Yes   | Yes   | Yes   | Yes   | Yes   |
| Roh et al. <sup>29</sup>      | Yes   | Yes   | Yes   | Not applicable | Yes   | Yes   | Yes   | Yes   | Yes   |
| Patel et al. <sup>30</sup>    | Yes   | Yes   | Yes   | Not applicable | Yes   | Yes   | Yes   | Yes   | Yes   |

*Item 1* Was the sample frame appropriate to address the target population? *Item 2* Were study participants sampled in an appropriate way?, *Item 3* Was the sample size adequate?, *Item 4* Were the study subjects and the setting described in detail?, *Item 5* Was the data analysis conducted with sufficient coverage of the identified sample?, *Item 6* Were valid methods used for the identification of the condition?, *Item 7* Was the condition measured in a standard, reliable way for all participants?, *Item 8* Was there appropriate statistical analysis?, *Item 9* Was the response rate adequate, and if not, was the low response rate managed appropriately?

**eTable 8.** Joanna Briggs Institute Critical Appraisal Checklist for Case Series

|                                      | Item1 | Item2 | Item3 | Item4 | Item5 | Item6 | Item7 | Item8 | Item9          | Item 10        |
|--------------------------------------|-------|-------|-------|-------|-------|-------|-------|-------|----------------|----------------|
| Puchalski et al. <sup>31</sup>       | Yes   | Not applicable | Yes            |
| Manfredi et al. <sup>32</sup>        | Yes   | Not applicable | Yes            |
| Ambati et al. <sup>33</sup>          | Yes   | Yes   | Yes   | Yes   | No    | No    | Yes   | Yes   | Not applicable | Not applicable |
| Tano et al. <sup>34</sup>            | Yes   | Not applicable | Not applicable |
| Park et al. <sup>35</sup>            | Yes   | Yes   | Yes   | Yes   | Yes   | Yes   | No    | Yes   | Not applicable | Yes            |
| Marshall et al. <sup>36</sup>        | Yes   | Not applicable | Not applicable |
| Starekova et al. <sup>37</sup>       | Yes   | Not applicable | Yes            |
| Łażniak-Pfajfer et al. <sup>38</sup> | Yes   | Yes   | Yes   | Yes   | No    | Yes   | Yes   | Yes   | Not applicable | Not applicable |
| Meyer-Szary et al. <sup>39</sup>     | Yes   | Yes   | Yes   | Yes   | No    | Yes   | No    | Yes   | Not applicable | Not applicable |
| Ahmed et al. <sup>40</sup>           | Yes   | Yes   | Yes   | Yes   | Yes   | Yes   | No    | Yes   | Not applicable | Yes            |
| Freise et al. <sup>41</sup>          | Yes   | Not applicable | Not applicable |

*Item 1* Were there clear criteria for inclusion in the case series?, *Item 2* Was the condition measured in a standard, reliable, *Item 3* Were valid methods used for identification of the condition for all participants included in the case series?, *Item 4* Did the case series have consecutive inclusion of participants?, *Item 5* Did the case series have complete inclusion of participants?, *Item 6* Did the case series have complete inclusion of participants?, *Item 7* Was there clear reporting of clinical information of the participants?, *Item 8* Were the outcomes or follow up results of cases clearly reported?, *Item 9* Was there clear reporting of the presenting site(s)/clinic(s) demographic information?, *Item 10* Was statistical analysis appropriate?

**eTable 9.** GRADE Evidence Profile for the Included Studies

| First author                  | Study design        | Risk of bias                                                        | Inconsistency             | Indirectness             | Imprecision             | Publication bias | Effect size | Dose-response | All plausible confounding and bias | Quality grading |
|-------------------------------|---------------------|---------------------------------------------------------------------|---------------------------|--------------------------|-------------------------|------------------|-------------|---------------|------------------------------------|-----------------|
| Li et al. <sup>19</sup>       | Observational study | Low risk of bias                                                    | No serious inconsistency. | No serious indirectness. | No serious imprecision. | NA               | Not large   | NA            | No obvious confounding factors.    | Low             |
| Krug et al. <sup>20</sup>     | Observational study | Low risk of bias                                                    | No serious inconsistency. | No serious indirectness. | No serious imprecision. | NA               | Not large   | NA            | No obvious confounding factors.    | Moderate        |
| Mevorach et al. <sup>21</sup> | Observational study | Low risk of bias                                                    | No serious inconsistency. | No serious indirectness. | No serious imprecision. | NA               | Not large   | NA            | No obvious confounding factors.    | Low             |
| Truong et al. <sup>22</sup>   | Observational study | Low risk of bias                                                    | No serious inconsistency. | No serious indirectness. | No serious imprecision. | NA               | Not large   | NA            | No obvious confounding factors.    | Moderate        |
| Foltran et al. <sup>23</sup>  | Observational study | Low risk of bias                                                    | No serious inconsistency. | No serious indirectness. | No serious imprecision. | NA               | Not large   | NA            | No obvious confounding factors.    | Moderate        |
| Jain et al. <sup>24</sup>     | Observational study | Low risk of bias                                                    | No serious inconsistency. | No serious indirectness. | No serious imprecision. | NA               | Not large   | NA            | No obvious confounding factors.    | Moderate        |
| Amir et al. <sup>25</sup>     | Observational study | Low risk of bias                                                    | No serious inconsistency. | No serious indirectness. | No serious imprecision. | NA               | Not large   | NA            | No obvious confounding factors.    | Low             |
| Nygaard et al. <sup>26</sup>  | Observational study | Low risk of bias                                                    | No serious inconsistency. | No serious indirectness. | No serious imprecision. | NA               | Not large   | NA            | No obvious confounding factors.    | Low             |
| Chelala et al. <sup>27</sup>  | Observational study | Study subject was not a close representative of general population. | No serious inconsistency. | No serious indirectness. | No serious imprecision. | NA               | Not large   | NA            | No obvious confounding factors.    | Very Low        |
| Das et al. <sup>28</sup>      | Observational study | Low risk of bias                                                    | No serious inconsistency. | No serious indirectness. | No serious imprecision. | NA               | Not large   | NA            | No obvious confounding factors.    | Moderate        |
| Roh et al. <sup>29</sup>      | Observational study | Low risk of bias                                                    | No serious inconsistency. | No serious indirectness. | No serious imprecision. | NA               | Not large   | NA            | No obvious confounding factors.    | Moderate        |

|                            |                     |                                                                     |                           |                          |                          |    |           |    |                                 |     |
|----------------------------|---------------------|---------------------------------------------------------------------|---------------------------|--------------------------|--------------------------|----|-----------|----|---------------------------------|-----|
| Patel et al. <sup>30</sup> | Observational study | Study subject was not a close representative of general population. | No serious inconsistency. | No serious indirectness. | No serious imprecision . | NA | Not large | NA | No obvious confounding factors. | Low |
|----------------------------|---------------------|---------------------------------------------------------------------|---------------------------|--------------------------|--------------------------|----|-----------|----|---------------------------------|-----|

Abbreviations: *NA*, not applicable

**eTable 10.** Results of Egger Linear Regression Tests of the Clinical Presentation and Outcomes

| Clinical presentation and outcome | Intercept | <i>t</i> | <i>p</i> |
|-----------------------------------|-----------|----------|----------|
| LV systolic dysfunction           | -0.35     | 0.91     | 0.391    |
| Mild LV systolic dysfunction      | -0.38     | 1.10     | 0.320    |
| Moderate LV systolic dysfunction  | 0.70      | 0.94     | 0.389    |
| Severe LV systolic dysfunction    | 0.47      | 0.45     | 0.672    |
| LGE                               | 1.63      | 2.94     | 0.061    |
| Hospitalization                   | 0.98      | 3.00     | 0.024    |
| ICU admission                     | -0.73     | 0.38     | 0.726    |
| Hospital length of stay           | 2.76      | 1.64     | 0.151    |

Abbreviations: ICU, intensive care unit; LGE, late gadolinium enhancement; LV, left ventricular



**eTable 11.** Results of Point Estimate of the Clinical Presentation and Outcomes Using the Trim-and-Fill Analysis

| Clinical presentation and outcome | Studies Trimmed<br>(n) | Point estimate via random effects<br>for observed values (95% CI) | Point estimate via random effects<br>for adjusted values (95% CI) |
|-----------------------------------|------------------------|-------------------------------------------------------------------|-------------------------------------------------------------------|
| LV systolic dysfunction           | 0                      | 0.167 [0.130-0.212]                                               | 0.167 [0.130-0.212]                                               |
| Mild LV systolic dysfunction      | 2                      | 0.147 [0.112-0.192]                                               | 0.153 [0.117-0.197]                                               |
| Moderate LV systolic dysfunction  | 1                      | 0.019 [0.008-0.045]                                               | 0.016 [0.007-0.037]                                               |
| Severe LV systolic dysfunction    | 0                      | 0.023 [0.010-0.052]                                               | 0.023 [0.010-0.052]                                               |
| LGE                               | 3                      | 0.849 [0.749-0.866]                                               | 0.813 [0.720-0.853]                                               |
| Hospitalization                   | 3                      | 0.884 [0.854-0.909]                                               | 0.880 [0.843-0.904]                                               |
| ICU admission                     | 2                      | 0.208 [0.107-0.366]                                               | 0.277 [0.157-0.439]                                               |
| Hospital length of stay           | 2                      | 2.802 [2.136-2.292]                                               | 2.359 [1.692-2.243]                                               |

Abbreviations: ICU, intensive care unit; LGE, late gadolinium enhancement; LV, left ventricular

**eFigure 1.** Forest Plots Showing the Pooled Estimates of Clinical Characteristics and Early Outcomes

a. Age

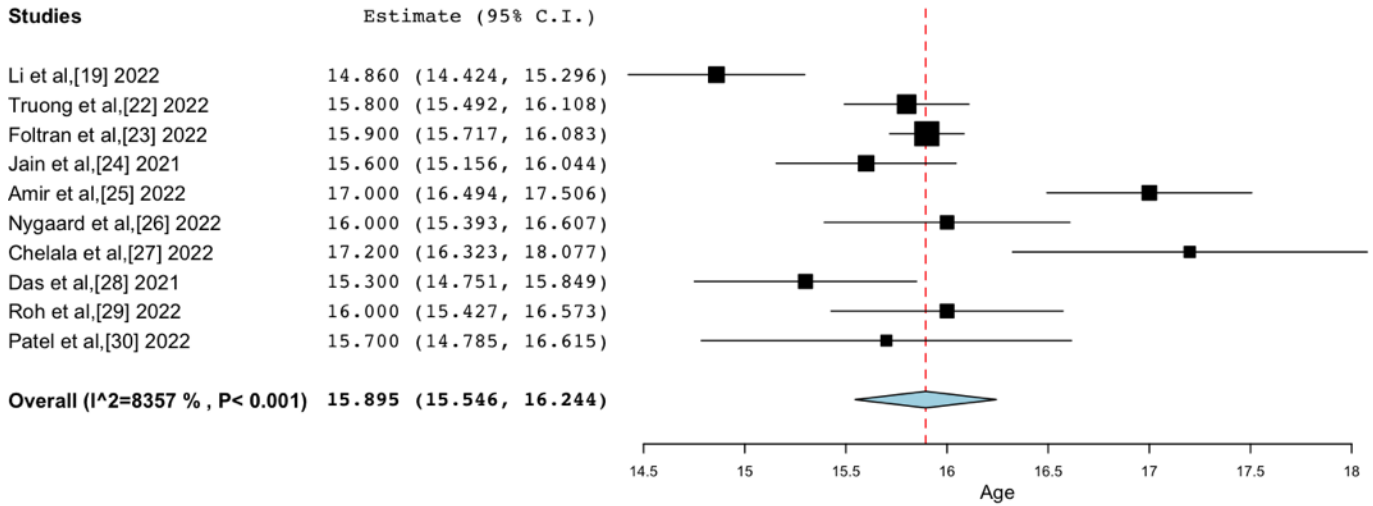

b. Male

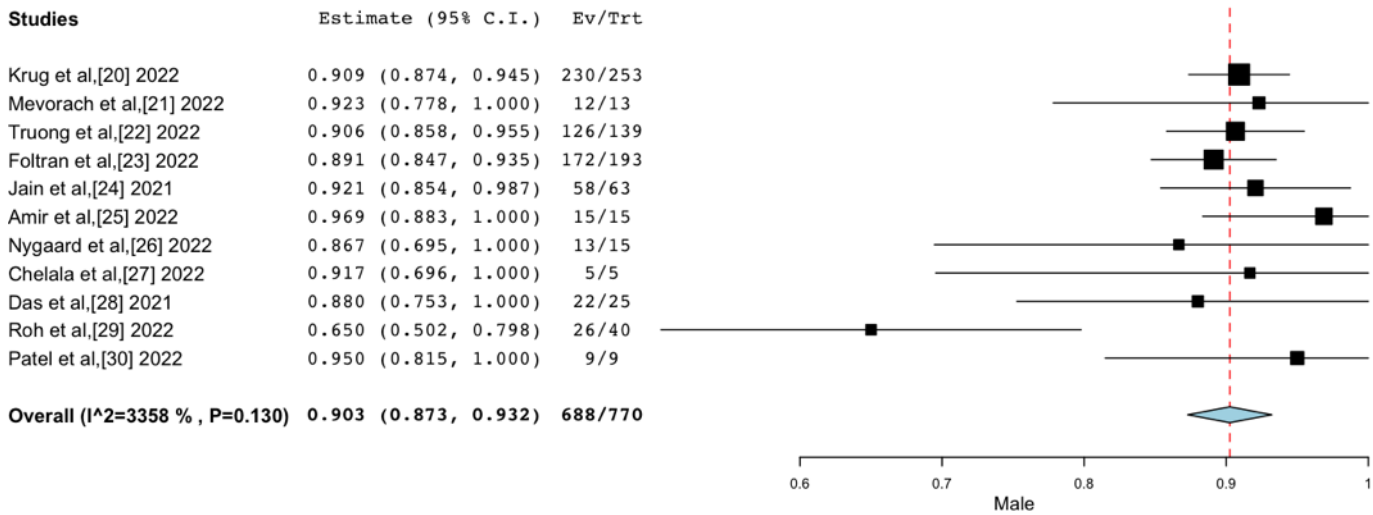

### c. History of COVID-19

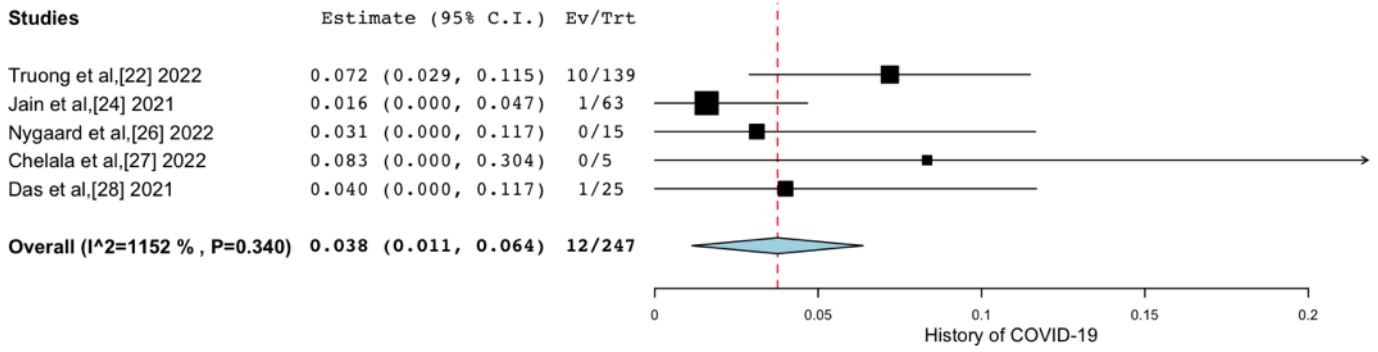

### d. 1st dose

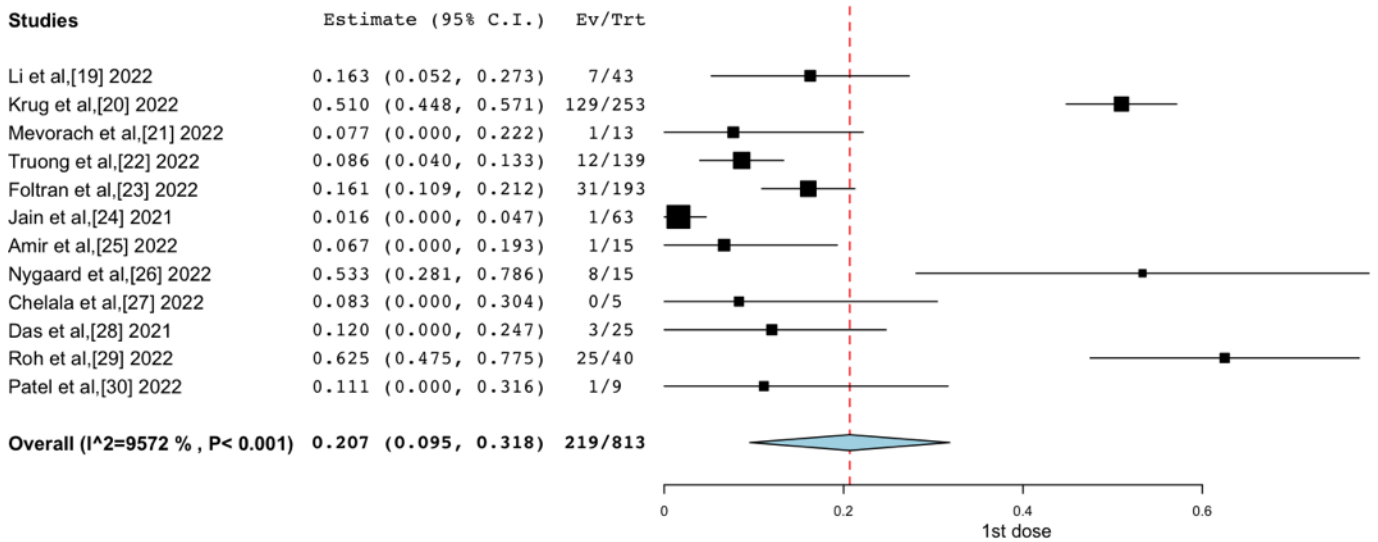

e. 2nd dose

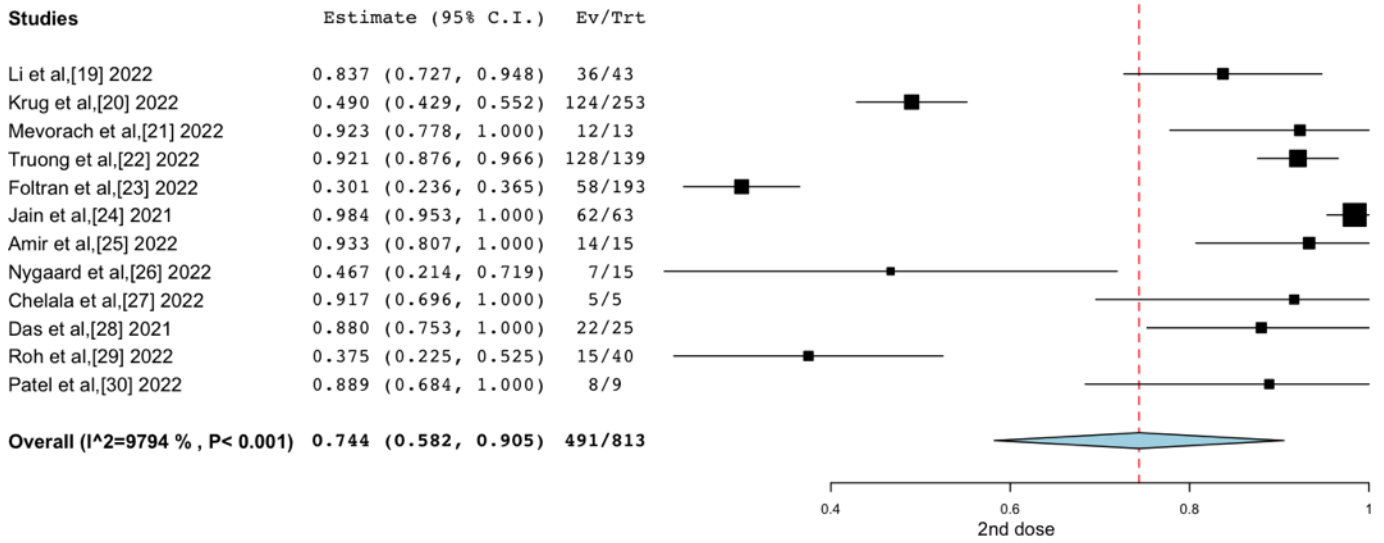

f. BNT162b2

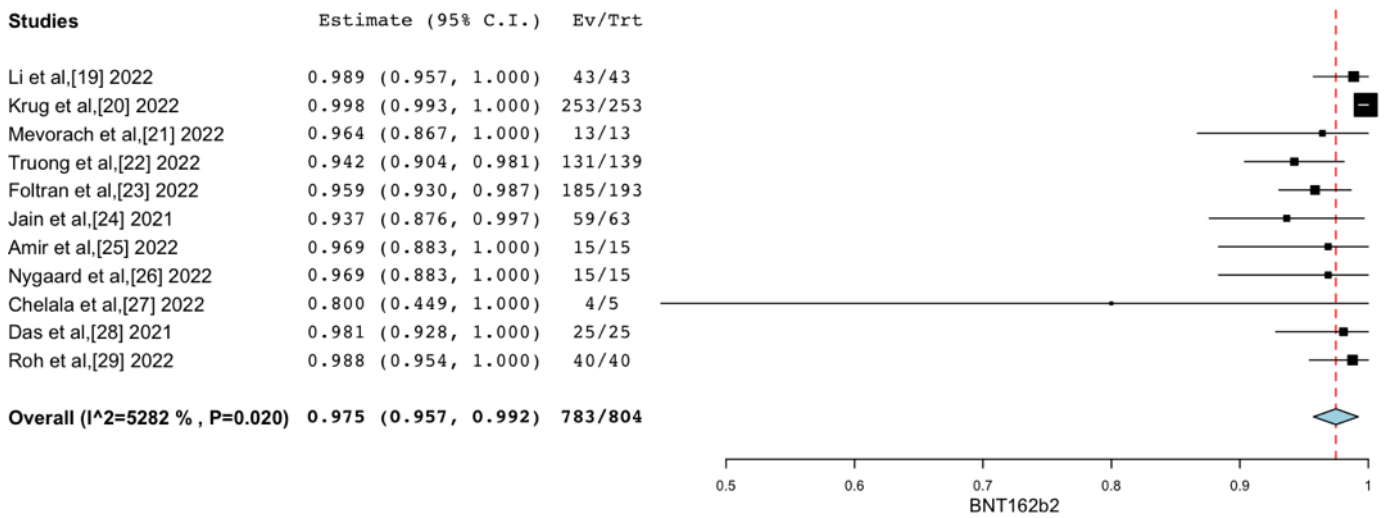

g. mRNA-1273

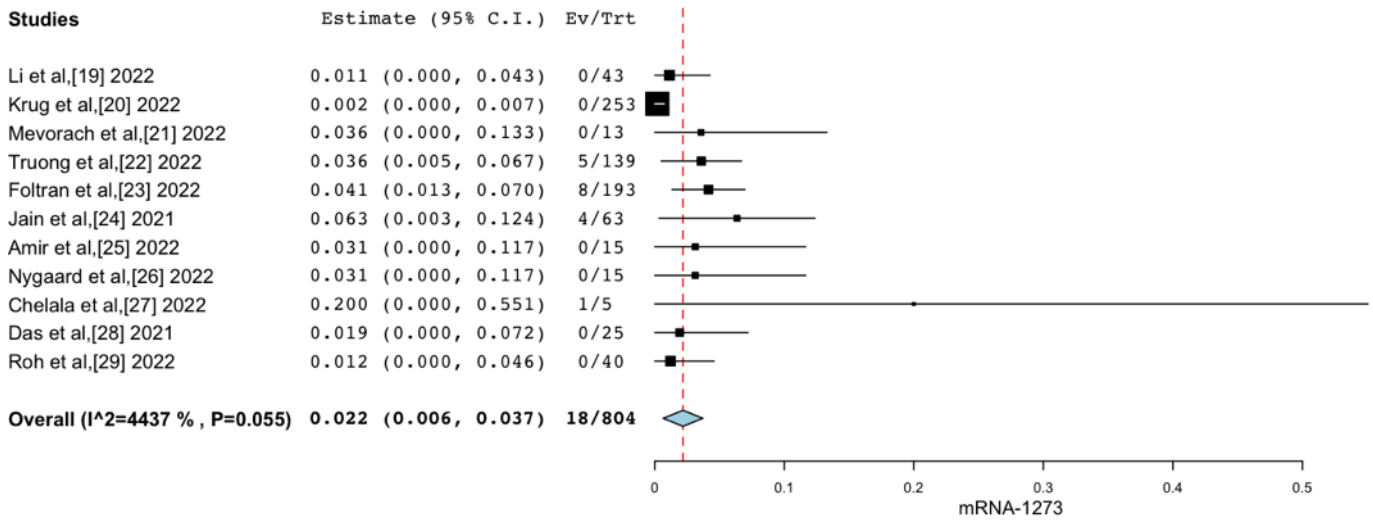

h. Days from vaccination to symptom onset

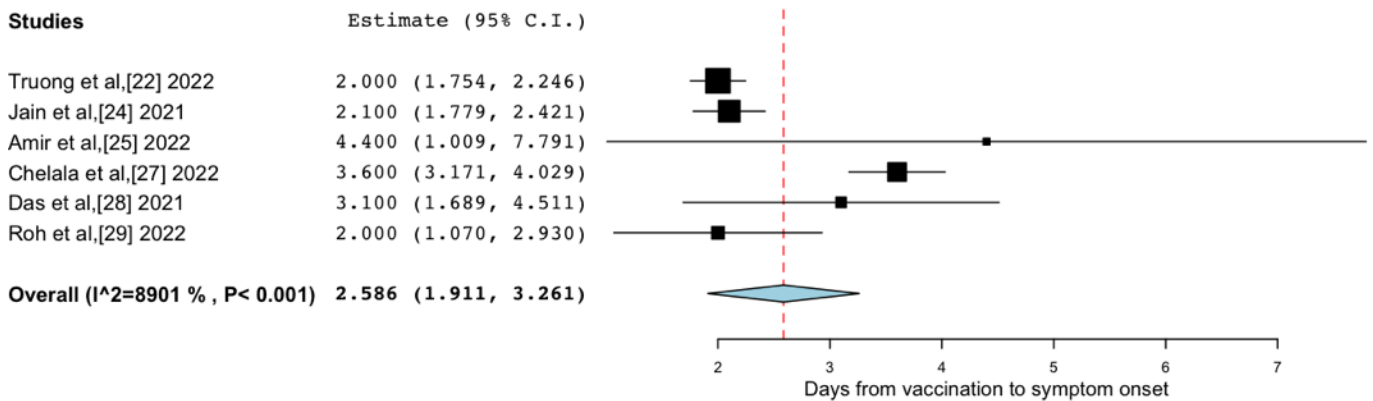

### i. Chest pain

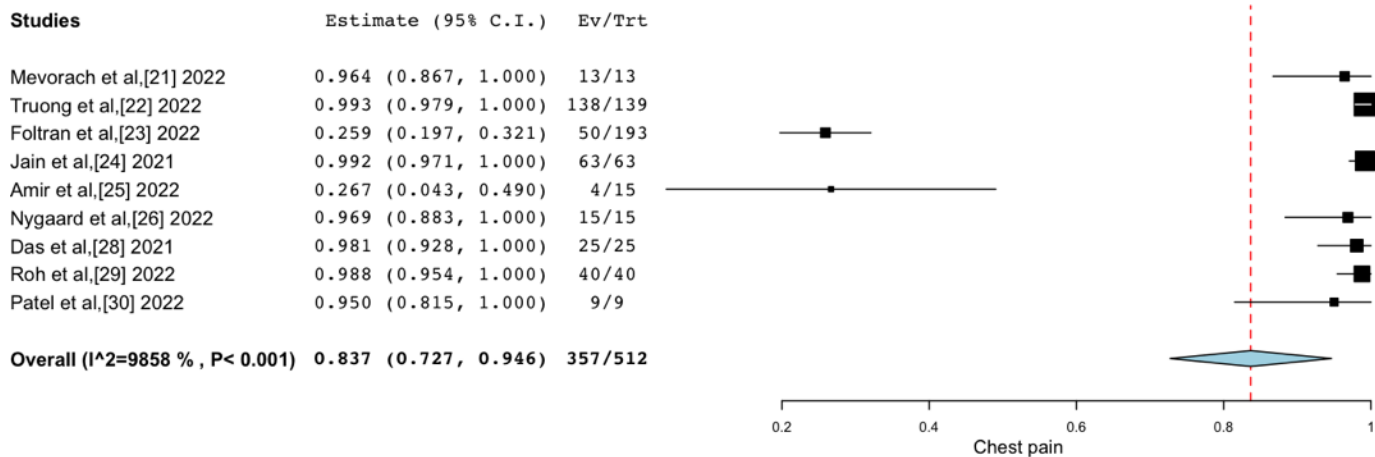

### j. Fever

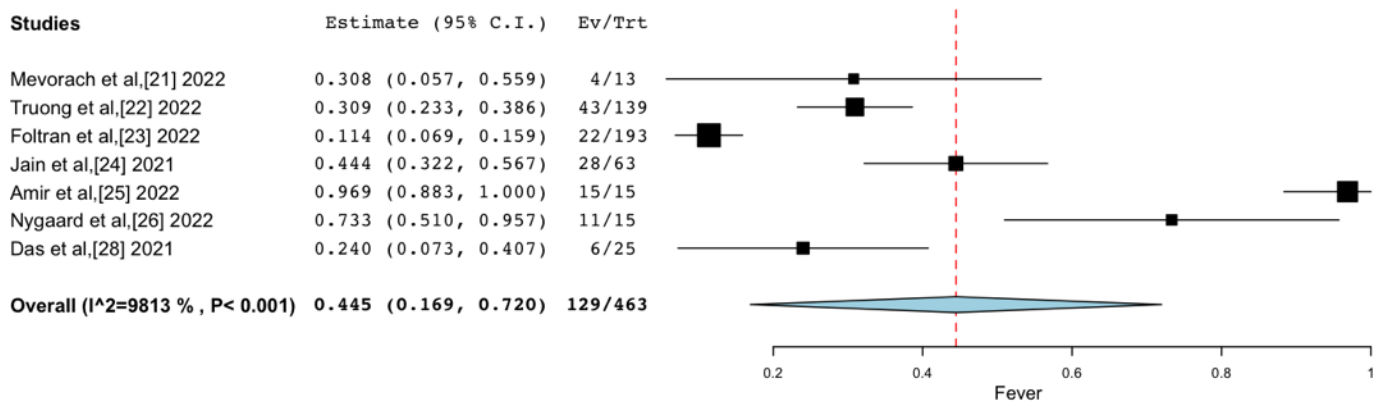

### k. Headache

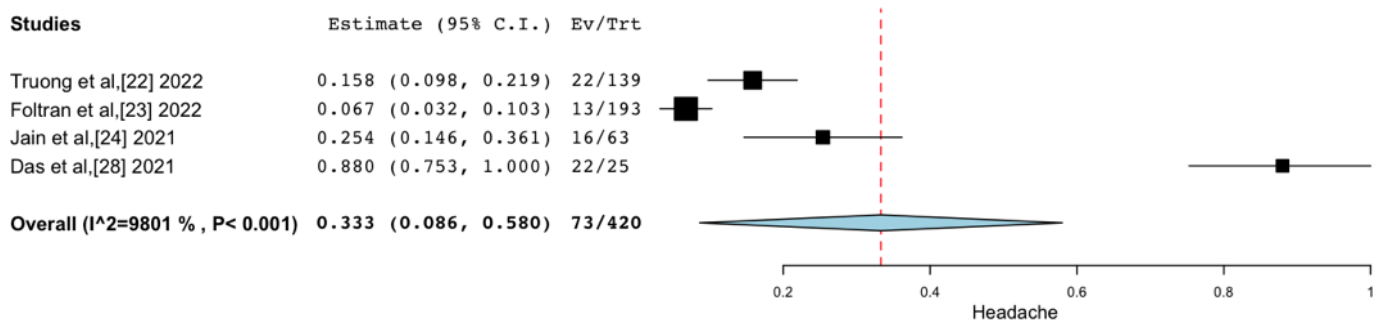



## I. Dyspnea/ Respiratory distress

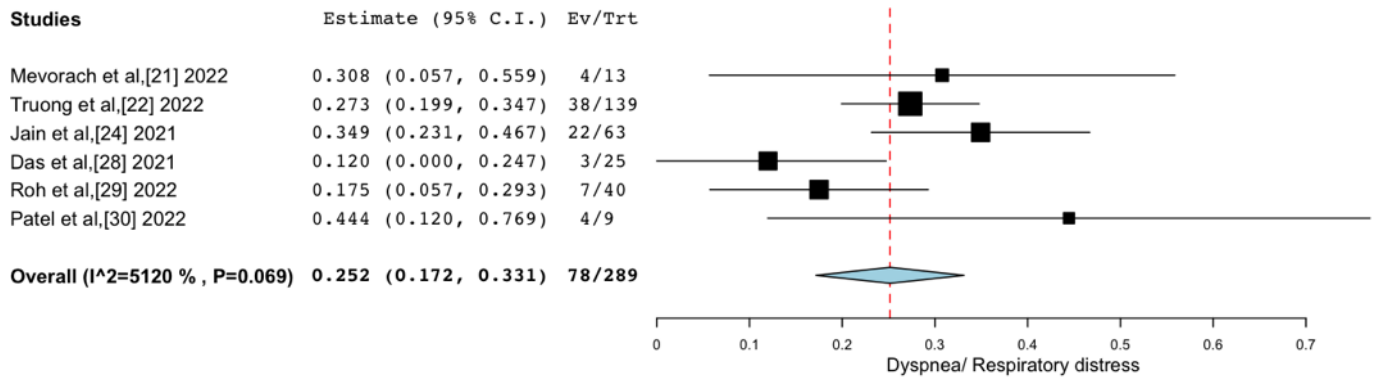

## m. Myalgia

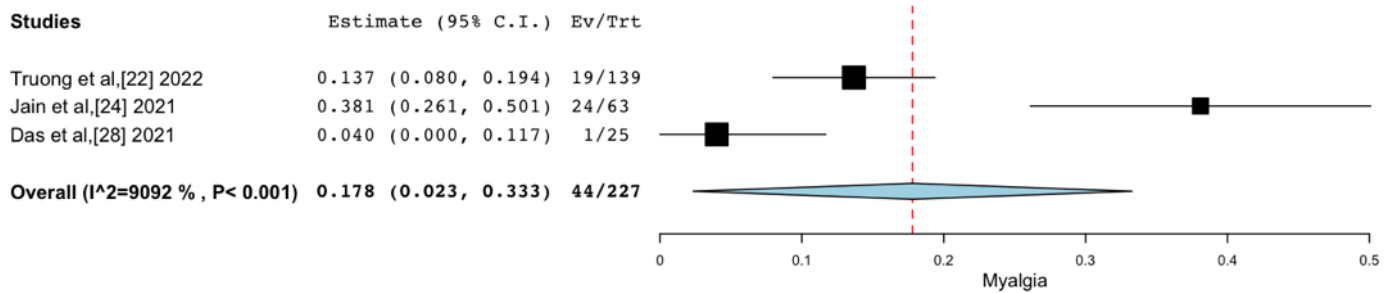

## n. NSAIDs

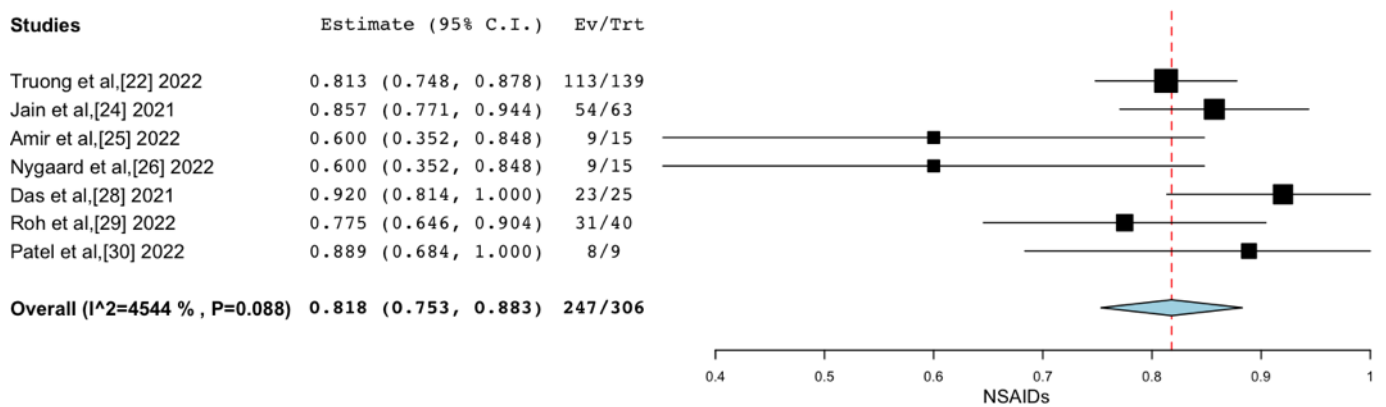



## o. Glucocorticoid

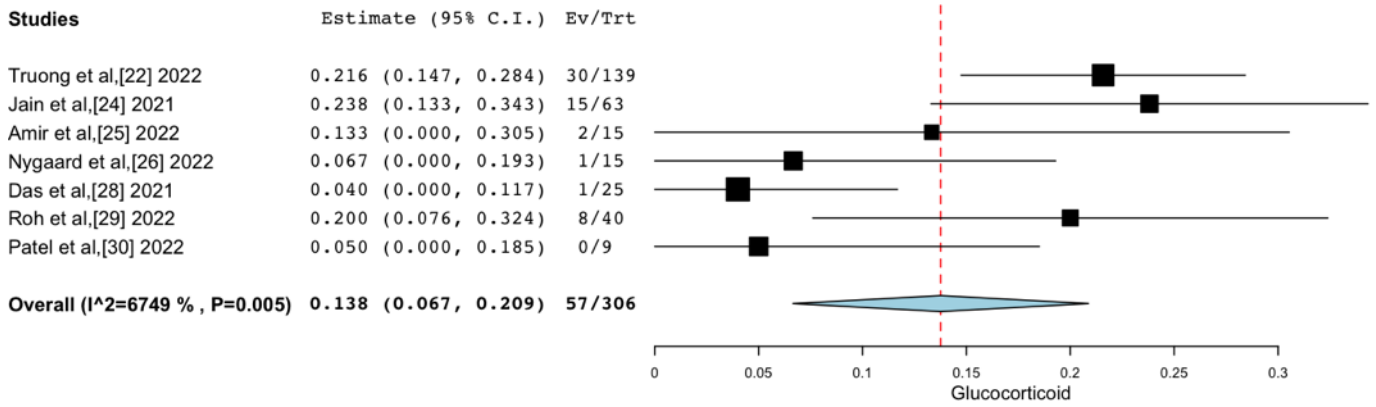

## p. IVIG

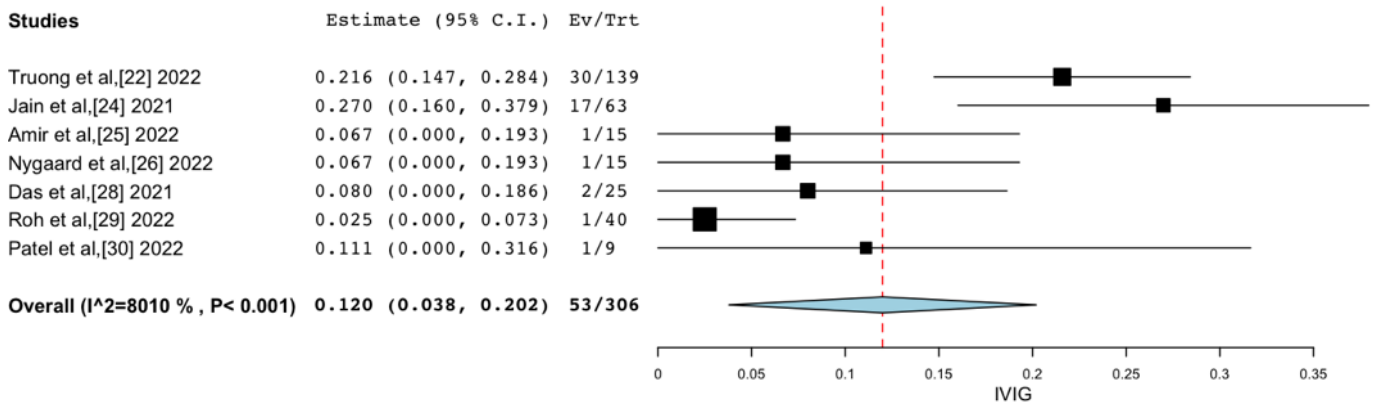

## q. Colchicine

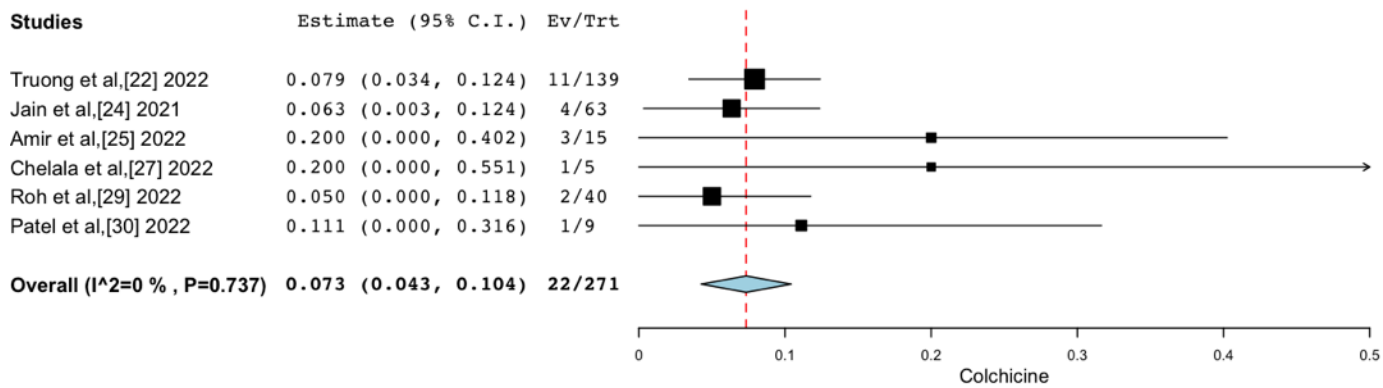

r. Elevated troponin I

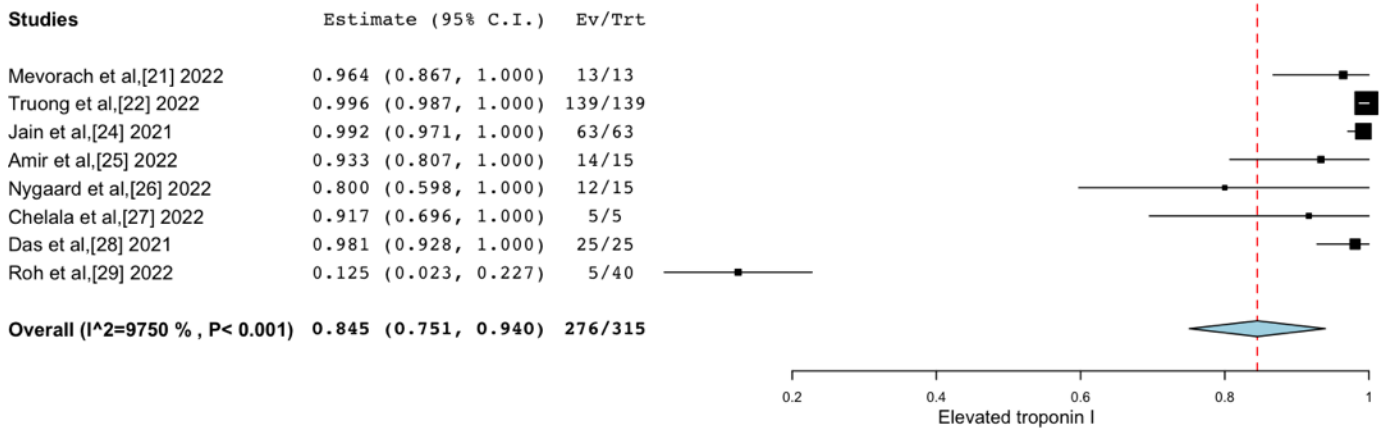

s. ST elevation/changes

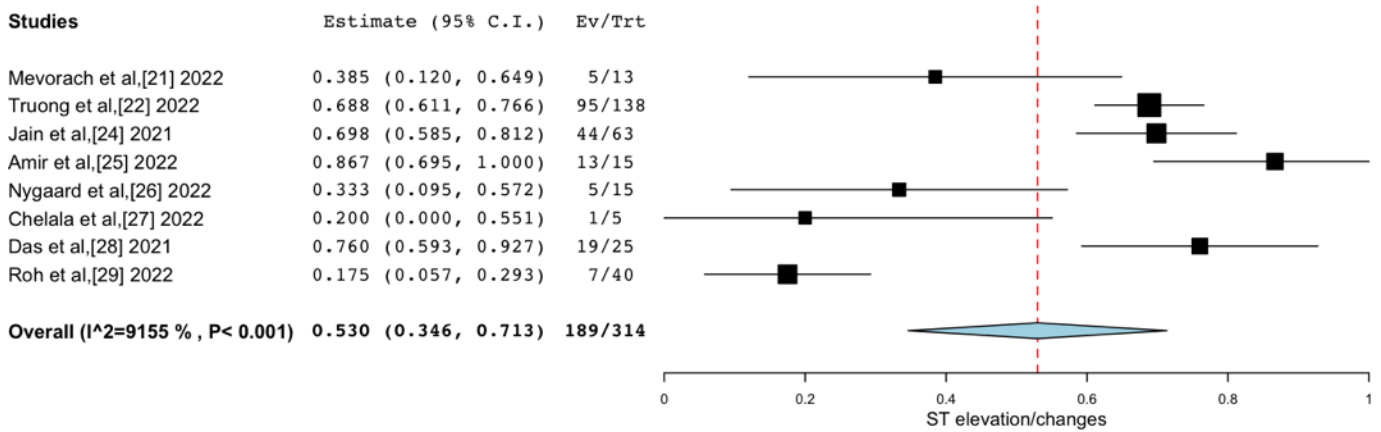

t. T wave changes

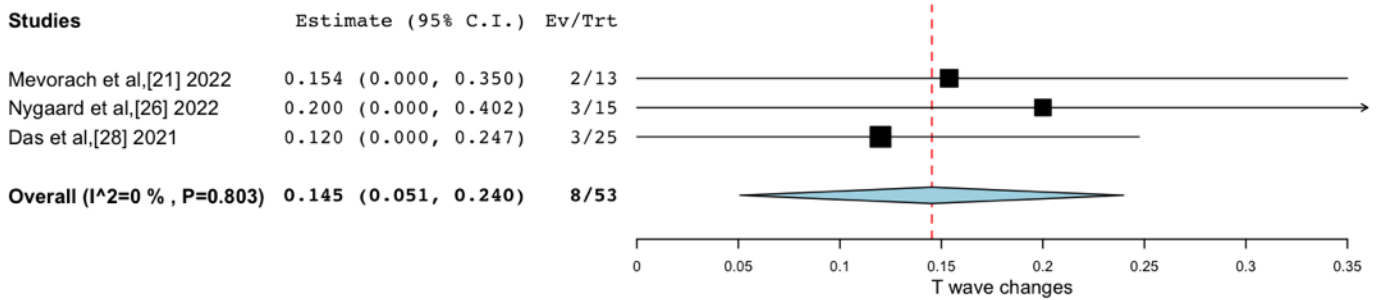

u. NSVT

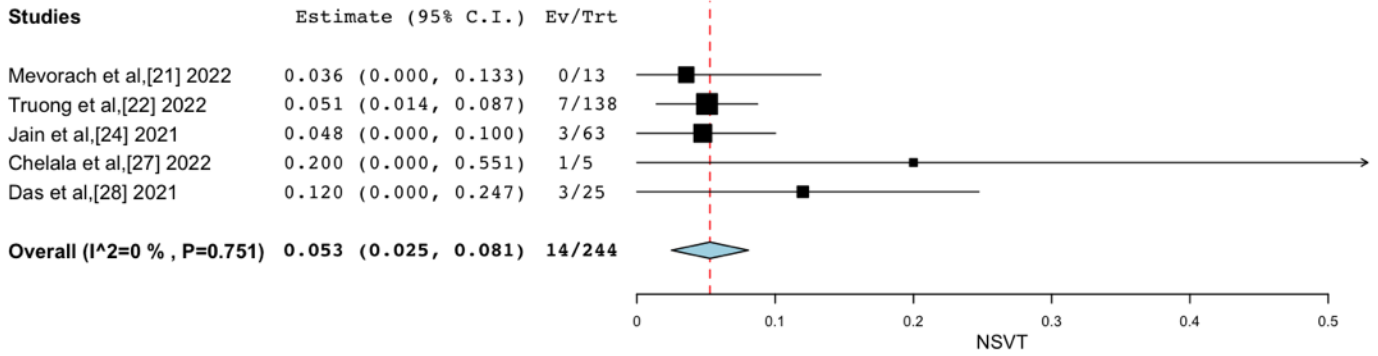

v. LVEF

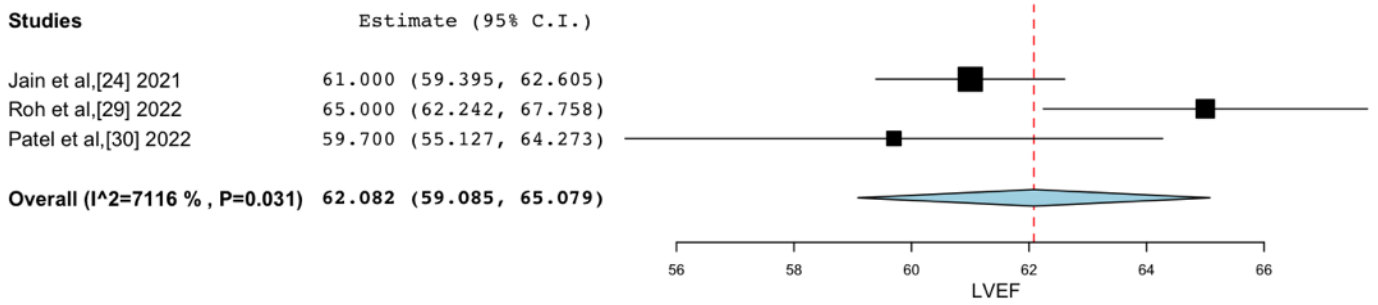

w. LV systolic dysfunction (LVEF<55%)

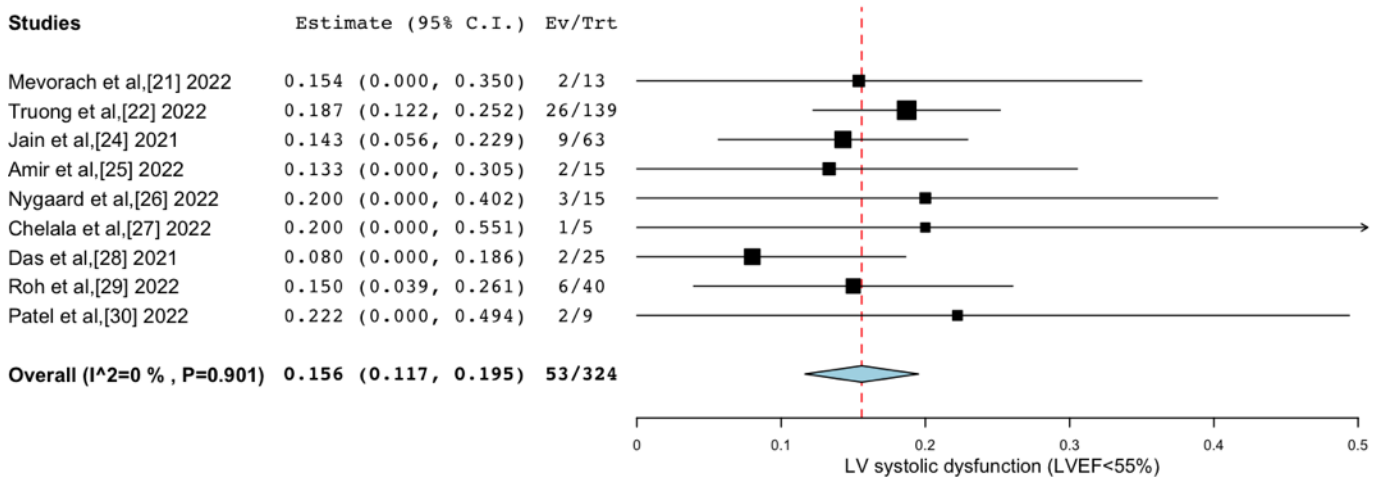



## x. Pericardial effusion

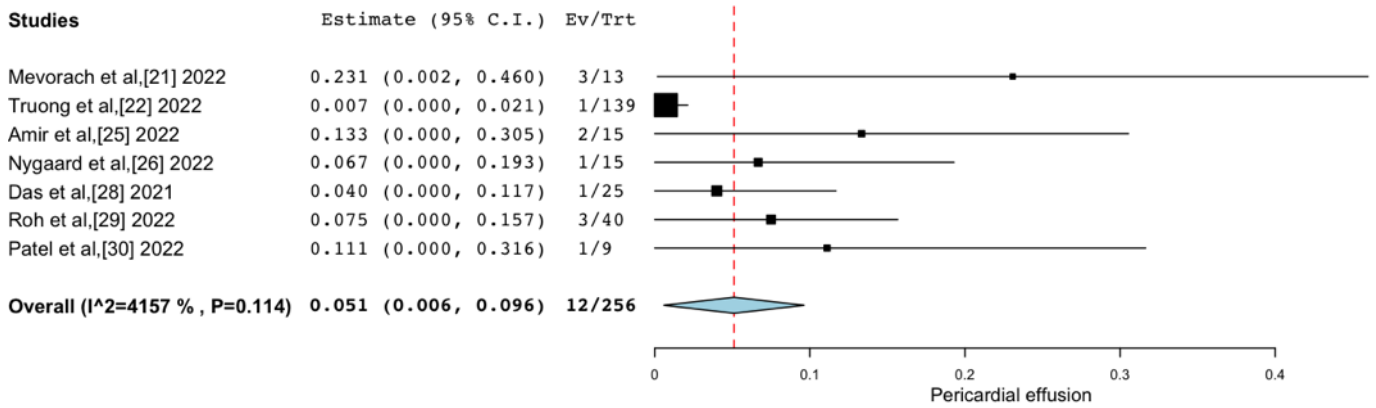

## y. Myocardial edema

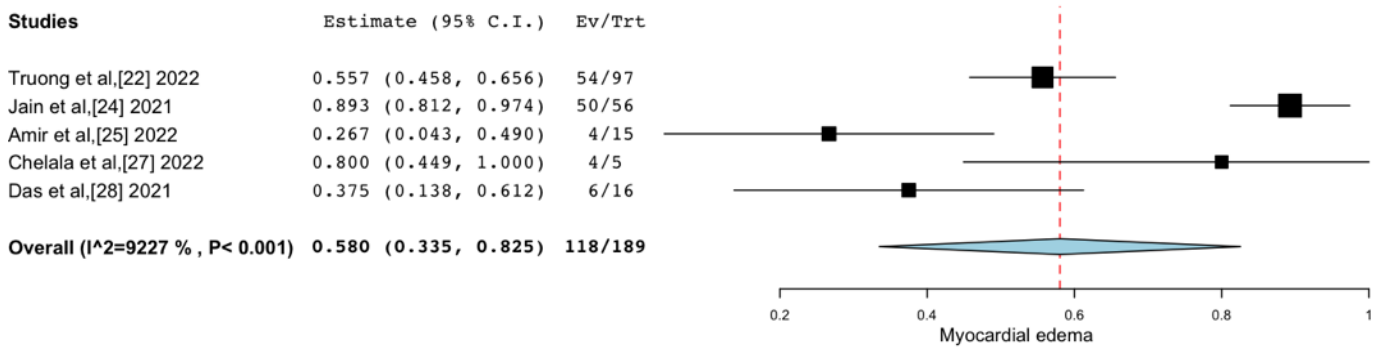

## z. Inotropes

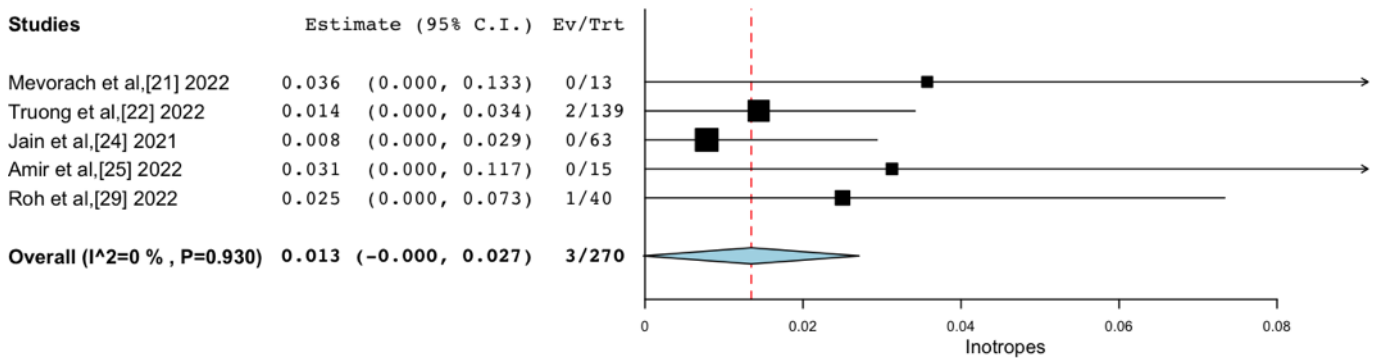

Abbreviations: IVIG, intravenous immune globulin; LV, left ventricular; LVEF, left ventricle ejection fraction; NSAIDS, Non-steroidal anti-inflammatory drugs; NSVT, Non-sustained ventricular tachycardia.

**eFigure 2.** Forest Plots of Subgroup Analysis Including Studies With Only Patients With Myocarditis

a. LV systolic dysfunction (LVEF<55%)

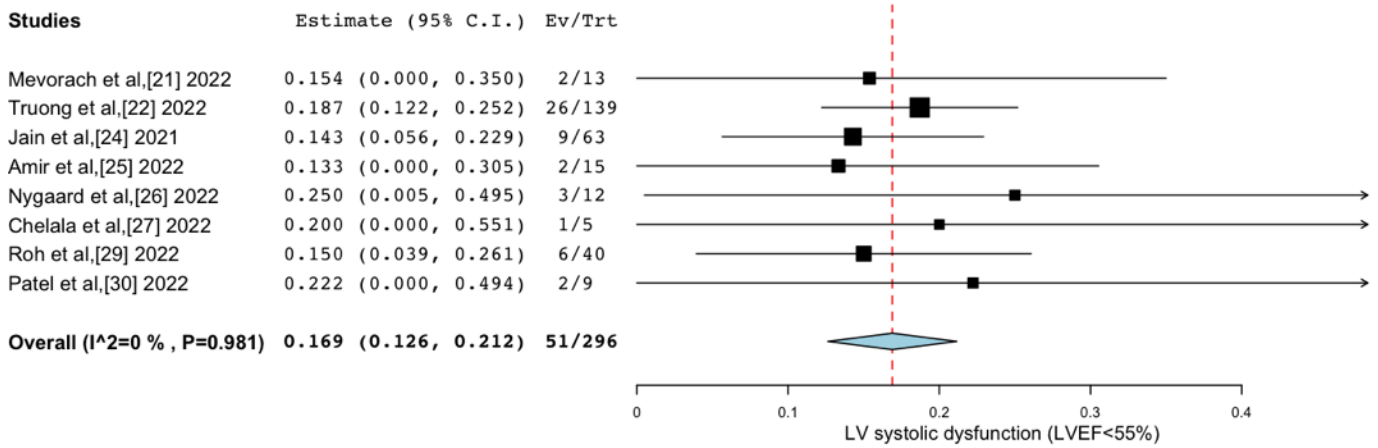

b. Mild LV systolic dysfunction (LVEF 45-54%)

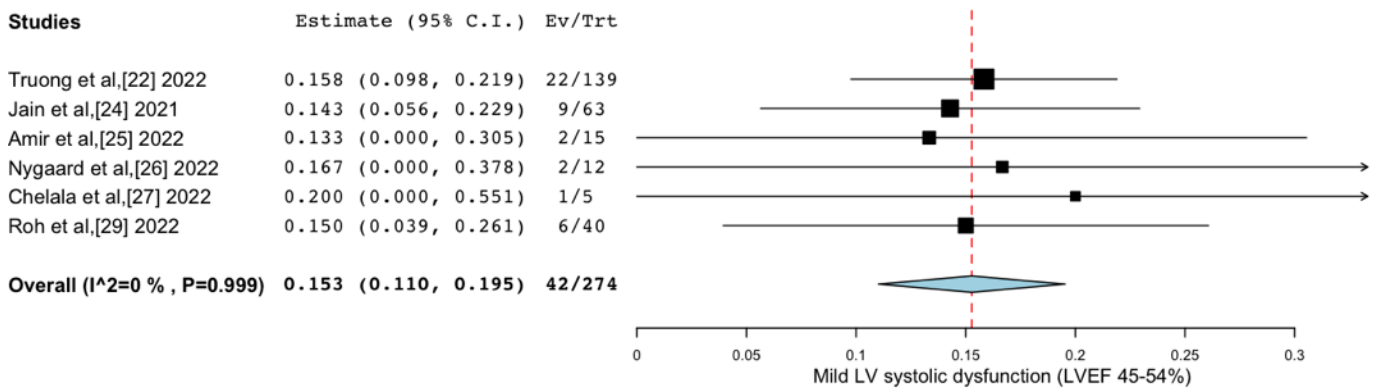



c. Moderate LV systolic dysfunction (LVEF 35-44%)

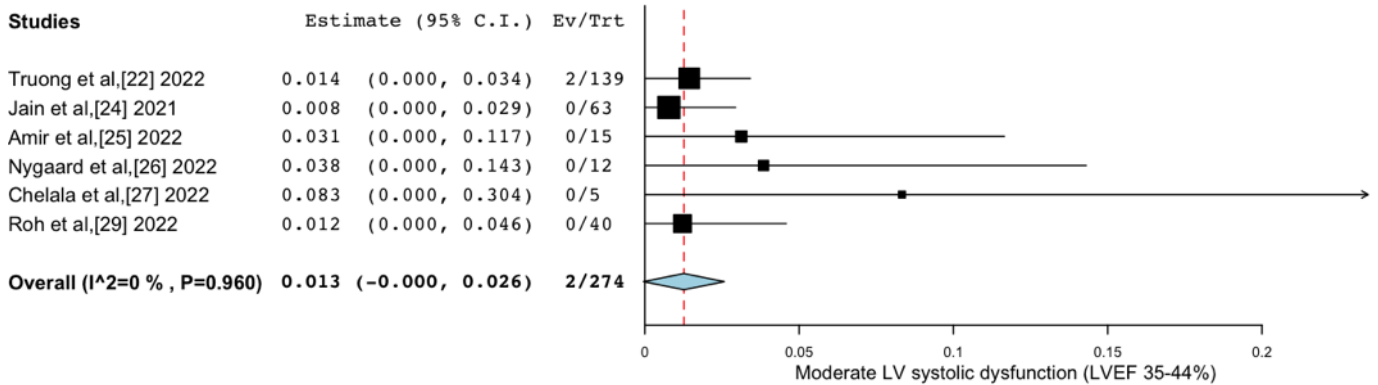

d. Severe LV systolic dysfunction (LVEF<35%)

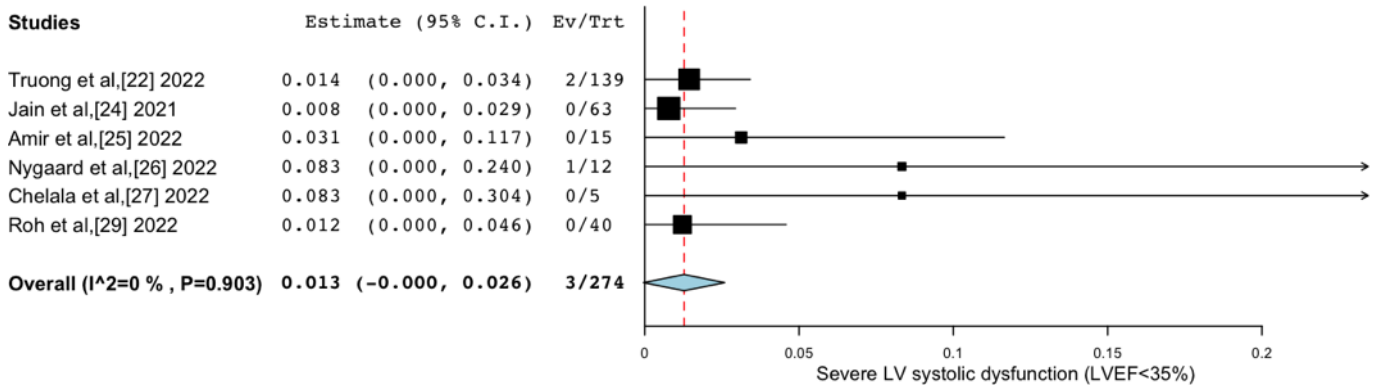

e. Late gadolinium enhancement (LGE)

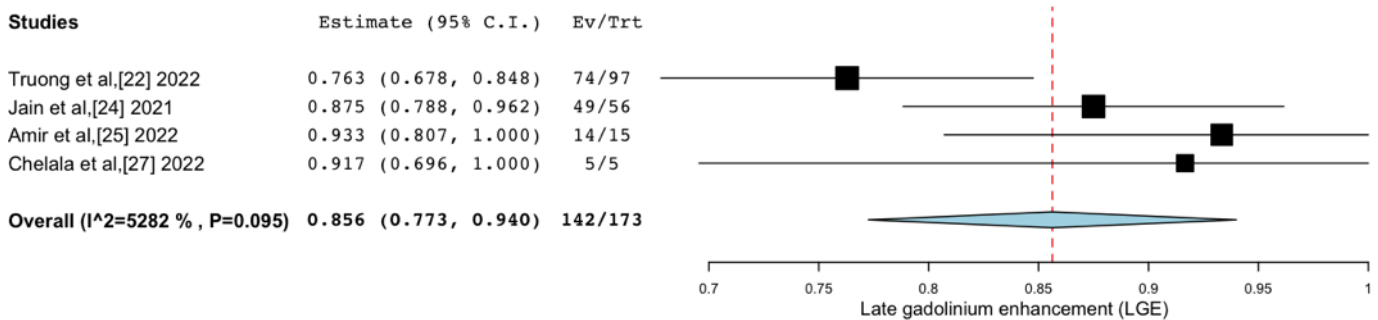



## f. Myocardial edema

| Studies                                            | Estimate (95% C.I.)         | Ev/Trt         |
|----------------------------------------------------|-----------------------------|----------------|
| Truong et al,[22] 2022                             | 0.557 (0.458, 0.656)        | 54/97          |
| Jain et al,[24] 2021                               | 0.893 (0.812, 0.974)        | 50/56          |
| Amir et al,[25] 2022                               | 0.267 (0.043, 0.490)        | 4/15           |
| Chelala et al,[27] 2022                            | 0.800 (0.449, 1.000)        | 4/5            |
| <b>Overall (I<sup>2</sup>=9317 %, P&lt; 0.001)</b> | <b>0.629 (0.358, 0.900)</b> | <b>112/173</b> |

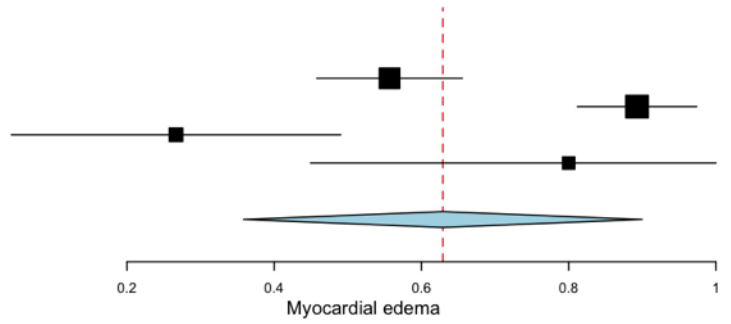

## g. Hospitalization

| Studies                                        | Estimate (95% C.I.)         | Ev/Trt         |
|------------------------------------------------|-----------------------------|----------------|
| Li et al,[19] 2022                             | 0.989 (0.957, 1.000)        | 43/43          |
| Mevorach et al,[21] 2022                       | 0.964 (0.867, 1.000)        | 13/13          |
| Foltran et al,[23] 2022                        | 0.891 (0.847, 0.935)        | 172/193        |
| Amir et al,[25] 2022                           | 0.867 (0.695, 1.000)        | 13/15          |
| Nygaard et al,[26] 2022                        | 0.962 (0.857, 1.000)        | 12/12          |
| Patel et al,[30] 2022                          | 0.950 (0.815, 1.000)        | 9/9            |
| <b>Overall (I<sup>2</sup>=6324 %, P=0.018)</b> | <b>0.944 (0.893, 0.994)</b> | <b>262/285</b> |

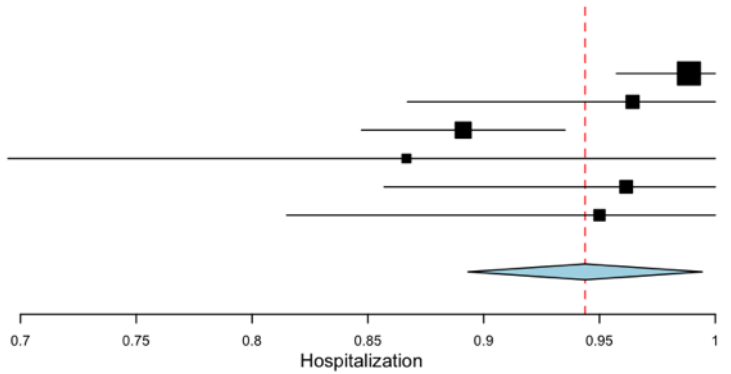

## h. ICU admission

| Studies                                            | Estimate (95% C.I.)         | Ev/Trt        |
|----------------------------------------------------|-----------------------------|---------------|
| Truong et al,[22] 2022                             | 0.187 (0.122, 0.252)        | 26/139        |
| Jain et al,[24] 2021                               | 0.429 (0.306, 0.551)        | 27/63         |
| Amir et al,[25] 2022                               | 0.467 (0.214, 0.719)        | 7/15          |
| Nygaard et al,[26] 2022                            | 0.083 (0.000, 0.240)        | 1/12          |
| Roh et al,[29] 2022                                | 0.125 (0.023, 0.227)        | 5/40          |
| Patel et al,[30] 2022                              | 0.222 (0.000, 0.494)        | 2/9           |
| <b>Overall (I<sup>2</sup>=7718 %, P&lt; 0.001)</b> | <b>0.238 (0.124, 0.352)</b> | <b>68/278</b> |

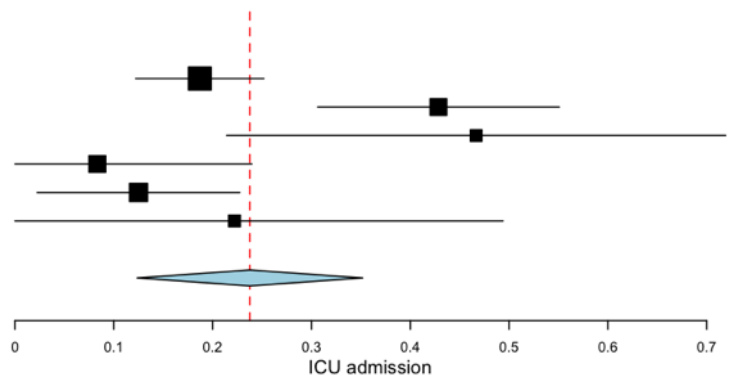

### i. Hospital length of stay

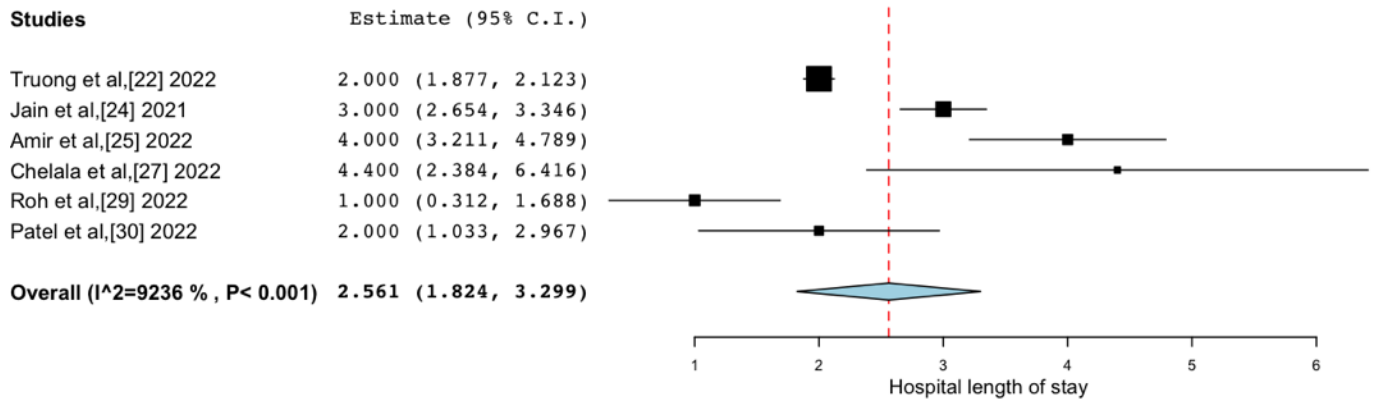

### j. Inotropes

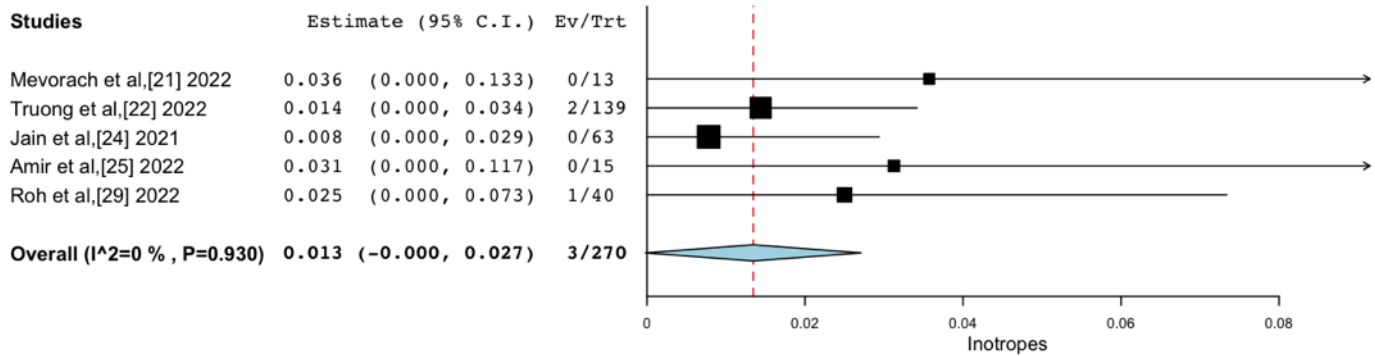

Abbreviations: ICU, intensive care unit; LV, left ventricular.

**eFigure 3. Risk of Bias Summary**

|                               | Was the study's target population a close representation of the national population in relation to relevant variables? | Was the sampling frame a true or close representation of the target population? | Was some form of random selection used to select the sample, OR was a census undertaken? | Was the likelihood of nonresponse bias minimal? | Were data collected directly from the subjects (as opposed to a proxy)? | Was an acceptable case definition used in the study? | Was the study instrument that measured the parameter of interest shown to have validity and reliability? | Was the same mode of data collection used for all subjects? | Was the length of the shortest prevalence period for the parameter of interest appropriate? | Were the numerator(s) and denominator(s) for the parameter of interest appropriate? |
|-------------------------------|------------------------------------------------------------------------------------------------------------------------|---------------------------------------------------------------------------------|------------------------------------------------------------------------------------------|-------------------------------------------------|-------------------------------------------------------------------------|------------------------------------------------------|----------------------------------------------------------------------------------------------------------|-------------------------------------------------------------|---------------------------------------------------------------------------------------------|-------------------------------------------------------------------------------------|
| Li et al. <sup>19</sup>       | +                                                                                                                      | +                                                                               | -                                                                                        | +                                               | +                                                                       | +                                                    | +                                                                                                        | +                                                           | +                                                                                           |                                                                                     |
| Krug et al. <sup>20</sup>     | +                                                                                                                      | +                                                                               | -                                                                                        | +                                               | +                                                                       | +                                                    | +                                                                                                        | -                                                           | +                                                                                           |                                                                                     |
| Mevorach et al. <sup>21</sup> | -                                                                                                                      | +                                                                               | -                                                                                        | +                                               | +                                                                       | +                                                    | +                                                                                                        | +                                                           | +                                                                                           |                                                                                     |
| Truong et al. <sup>22</sup>   | +                                                                                                                      | +                                                                               | -                                                                                        | +                                               | +                                                                       | +                                                    | +                                                                                                        | -                                                           | +                                                                                           |                                                                                     |
| Foltran et al. <sup>23</sup>  | -                                                                                                                      | -                                                                               | -                                                                                        | +                                               | +                                                                       | -                                                    | +                                                                                                        | +                                                           | +                                                                                           |                                                                                     |
| Jain et al. <sup>24</sup>     | +                                                                                                                      | +                                                                               | -                                                                                        | +                                               | +                                                                       | +                                                    | +                                                                                                        | -                                                           | +                                                                                           |                                                                                     |
| Amir et al. <sup>25</sup>     | -                                                                                                                      | +                                                                               | -                                                                                        | +                                               | +                                                                       | +                                                    | +                                                                                                        | +                                                           | +                                                                                           |                                                                                     |
| Nygaard et al. <sup>26</sup>  | -                                                                                                                      | -                                                                               | -                                                                                        | +                                               | +                                                                       | -                                                    | +                                                                                                        | +                                                           | +                                                                                           |                                                                                     |
| Chelala et al. <sup>27</sup>  | -                                                                                                                      | -                                                                               | -                                                                                        | +                                               | +                                                                       | -                                                    | +                                                                                                        | +                                                           | +                                                                                           |                                                                                     |
| Das et al. <sup>28</sup>      | -                                                                                                                      | +                                                                               | -                                                                                        | +                                               | +                                                                       | +                                                    | +                                                                                                        | -                                                           | +                                                                                           |                                                                                     |
| Roh et al. <sup>29</sup>      | -                                                                                                                      | +                                                                               | -                                                                                        | +                                               | +                                                                       | +                                                    | +                                                                                                        | +                                                           | +                                                                                           |                                                                                     |
| Patel et al. <sup>30</sup>    | -                                                                                                                      | +                                                                               | -                                                                                        | +                                               | +                                                                       | +                                                    | +                                                                                                        | +                                                           | +                                                                                           |                                                                                     |

**eFigure 4.** Funnel Plots of the Clinical Characteristics and Outcomes

a. LV systolic dysfunction

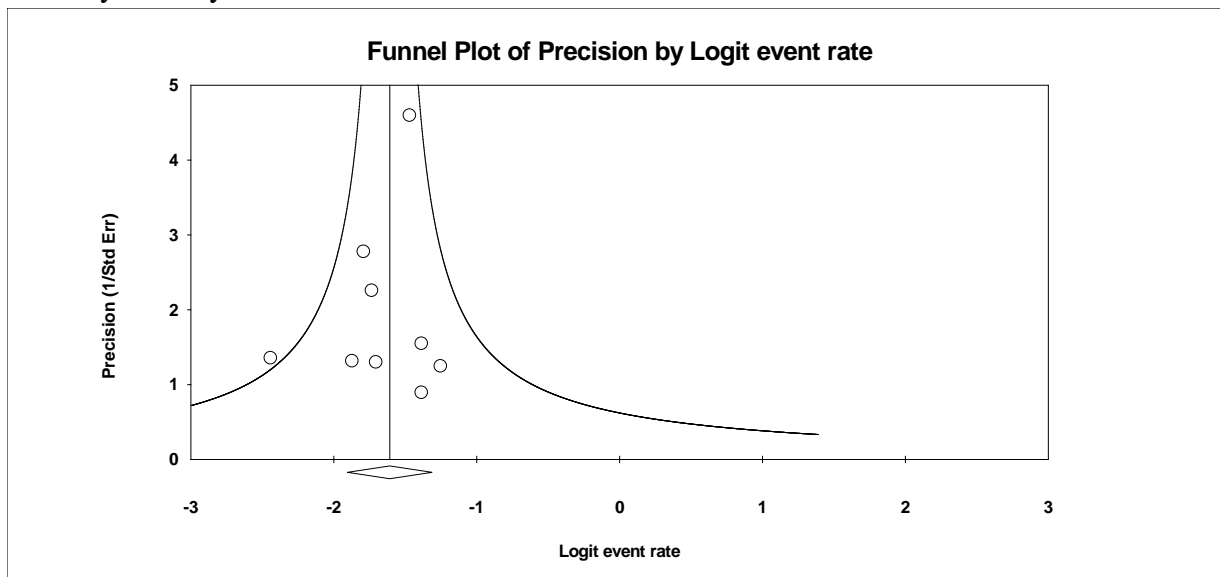

b. Mild LV systolic dysfunction

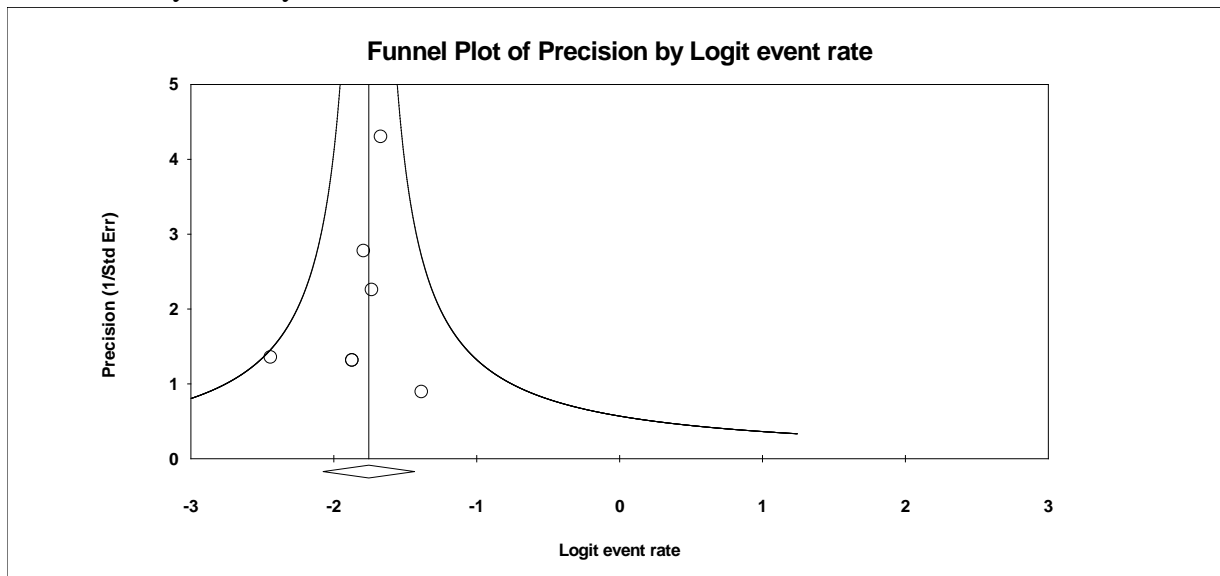

c. Moderate LV systolic dysfunction

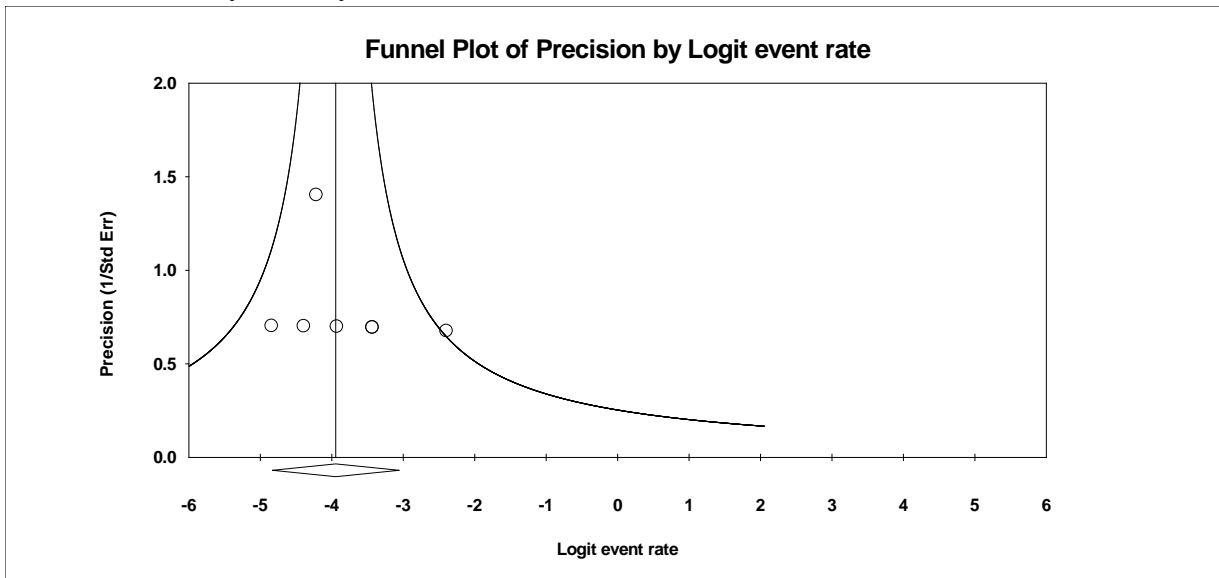

d. Severe LV systolic dysfunction

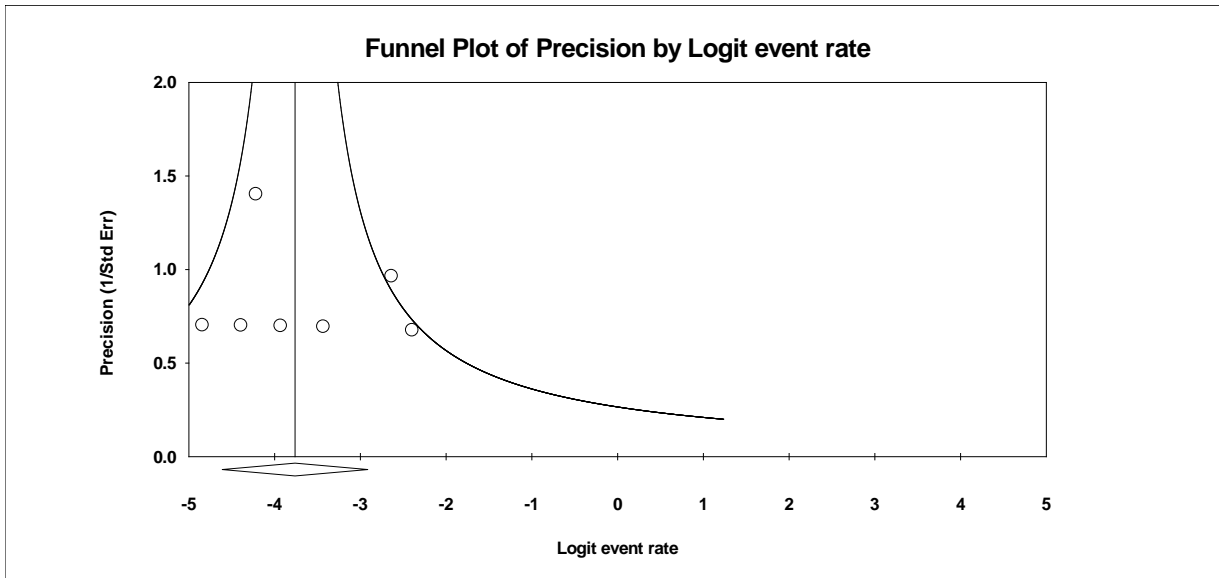

e. Late gadolinium enhancement (LGE)

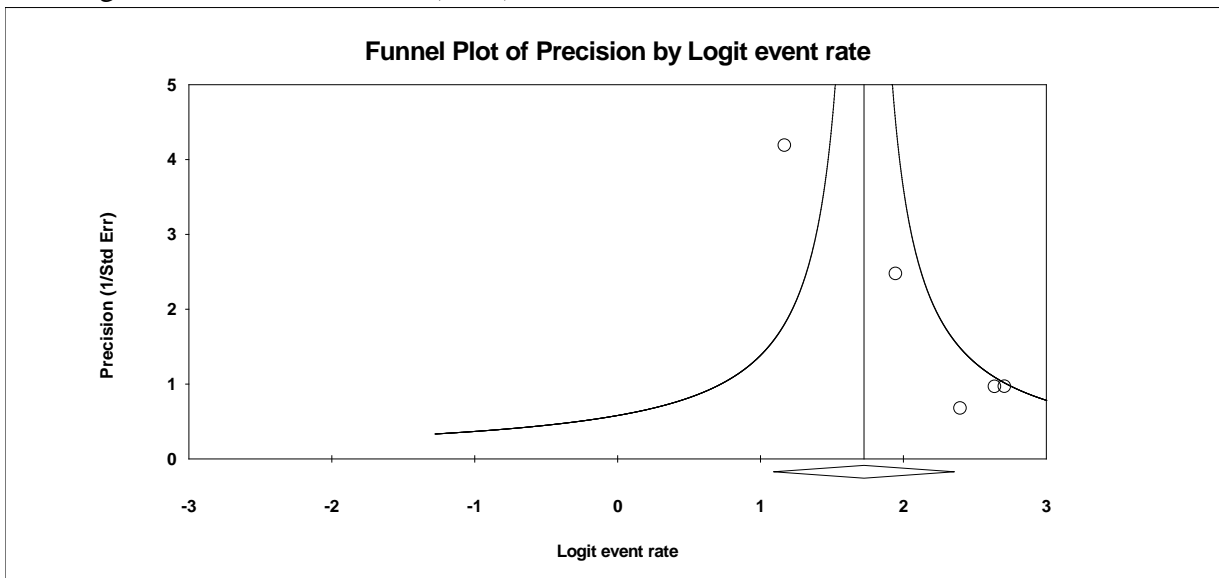

f. Hospitalization

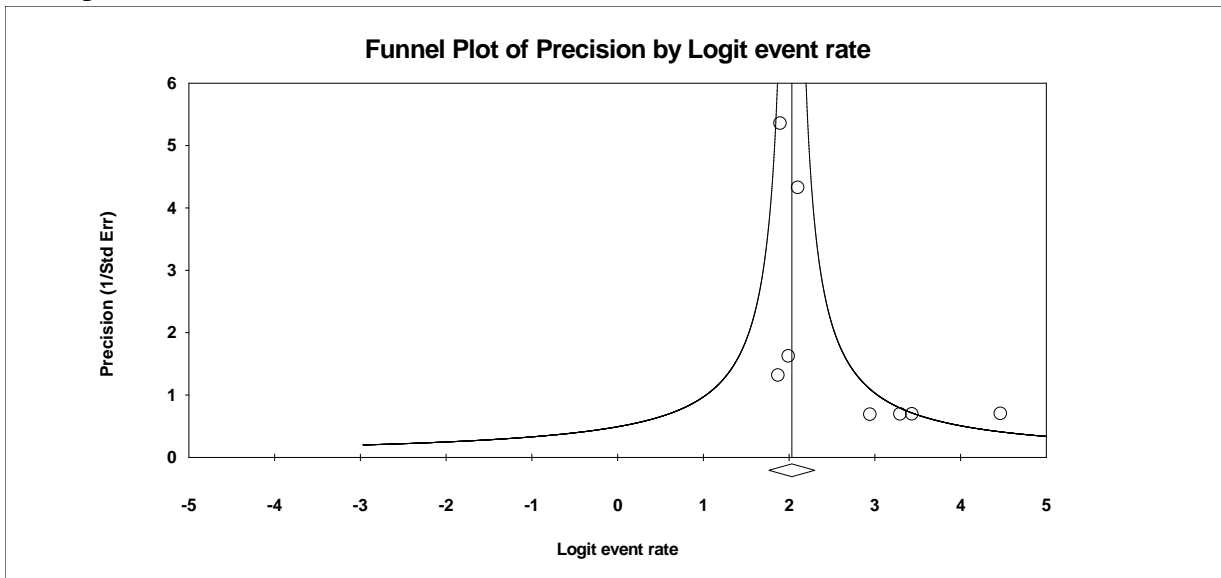

g. ICU admission

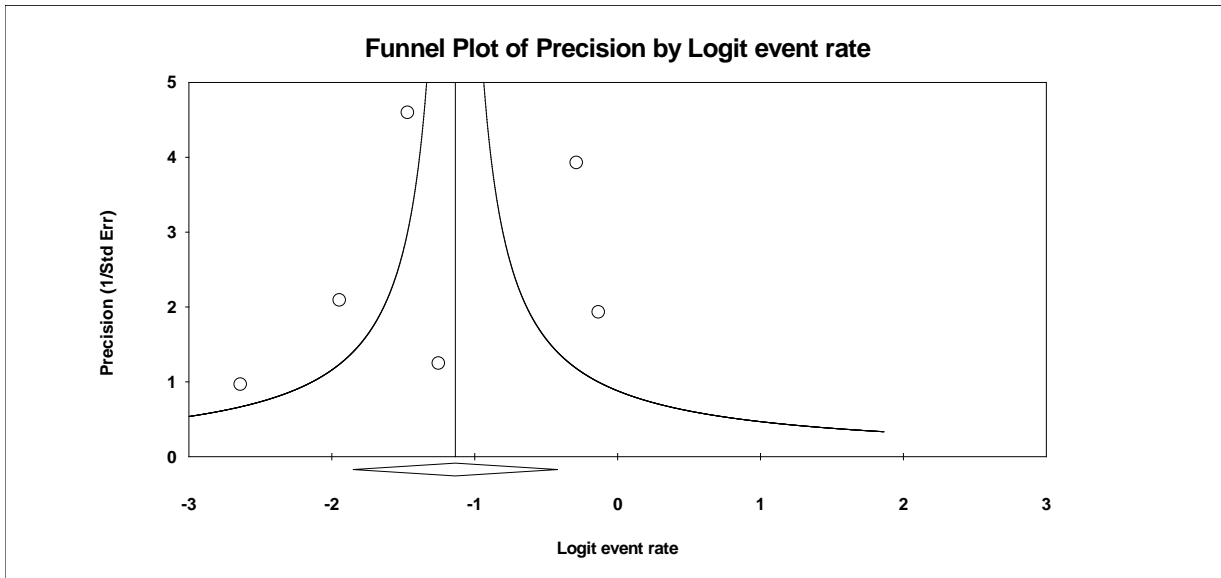

h. Hospital length of stay

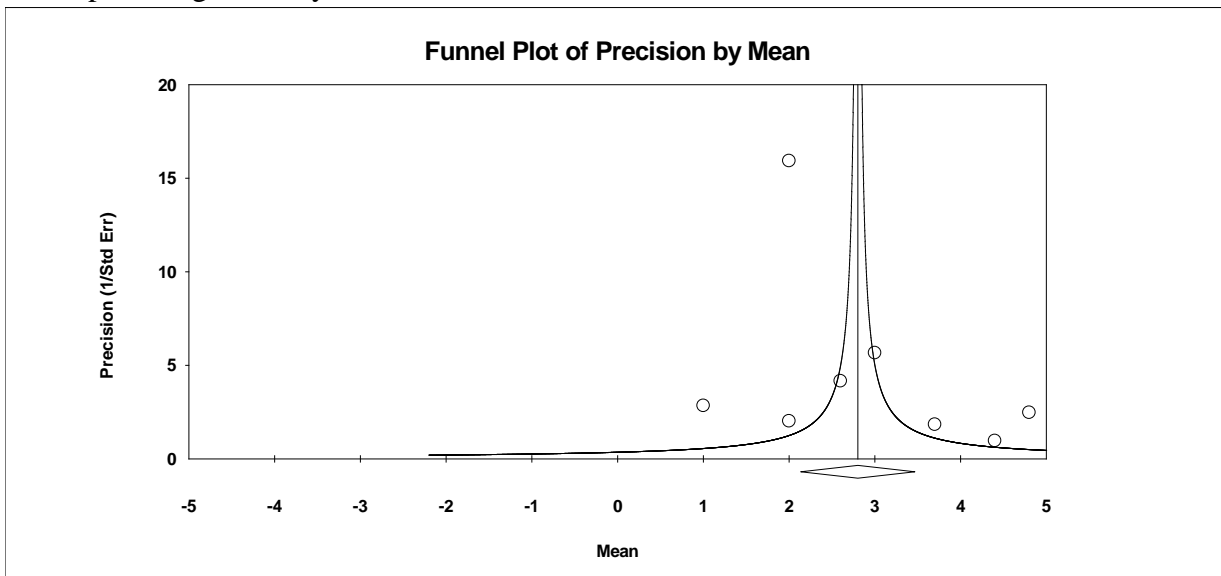

Abbreviations: ICU, intensive care unit; LV, left ventricular.



**eFigure 5.** Adjusted Funnel Plots of the Clinical Characteristics and Outcomes From the Trim-and-Fill Analysis

a. LV systolic dysfunction

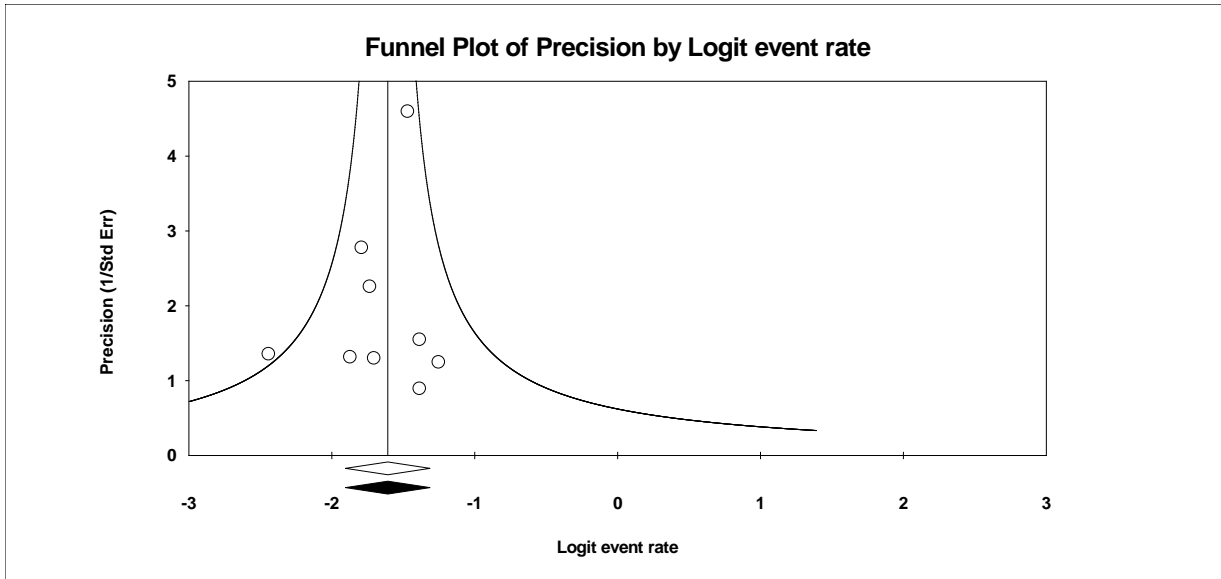

b. Mild LV systolic dysfunction

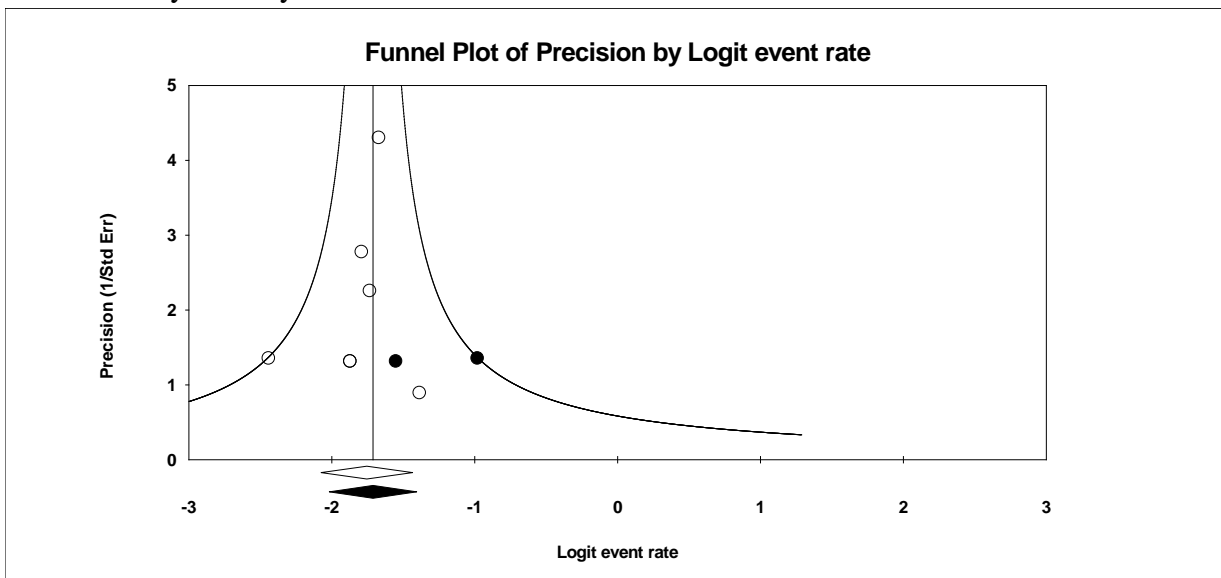

c. Moderate LV systolic dysfunction

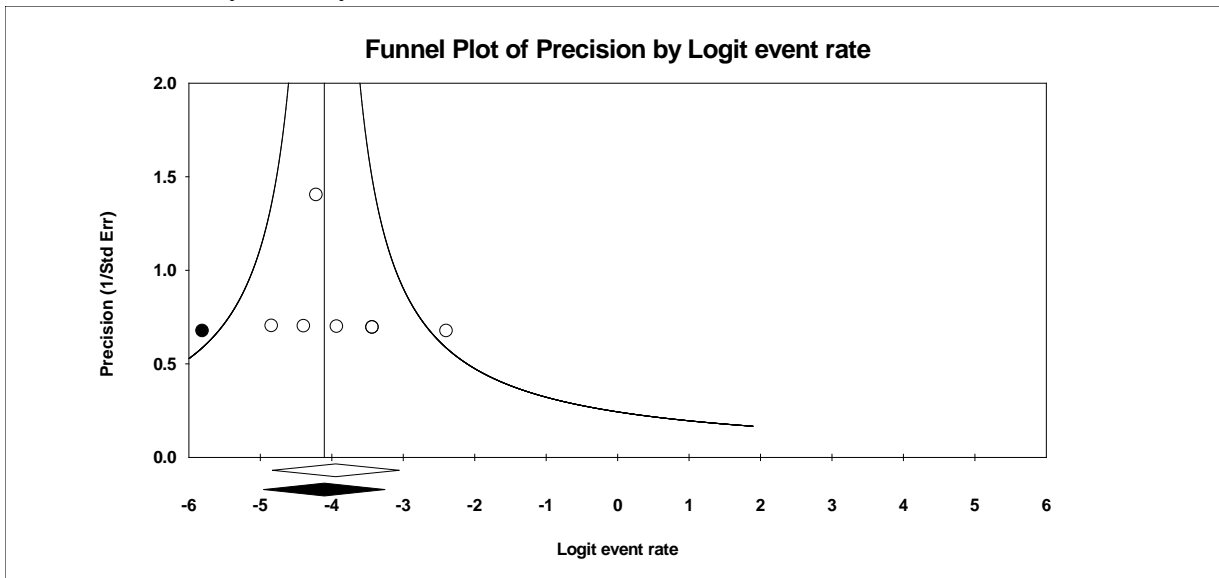

d. Severe LV systolic dysfunction

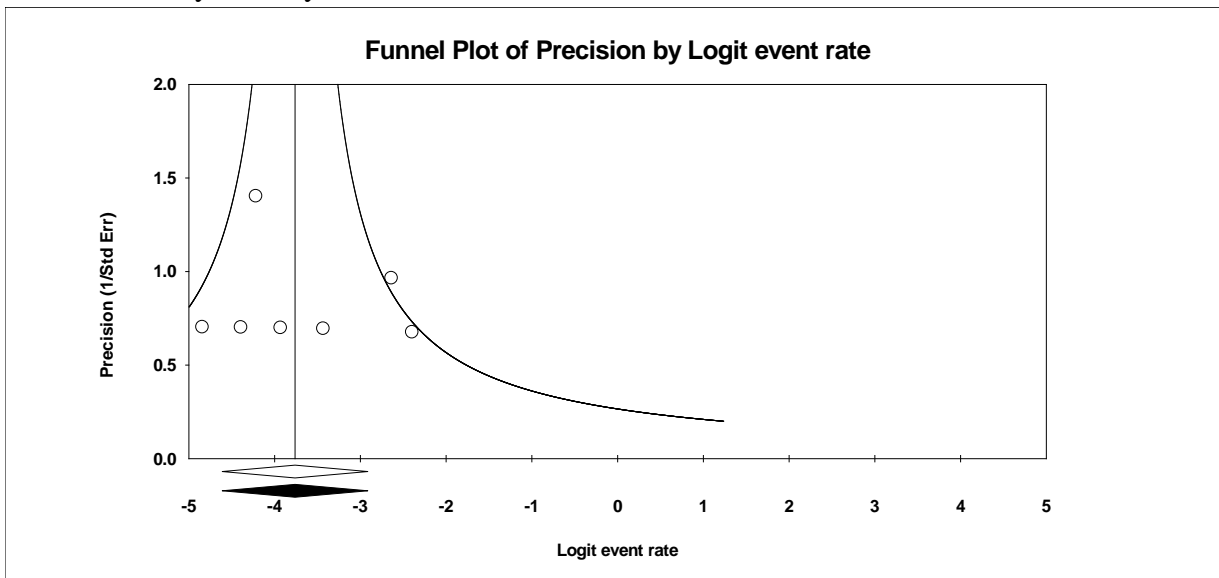

e. Late gadolinium enhancement (LGE)

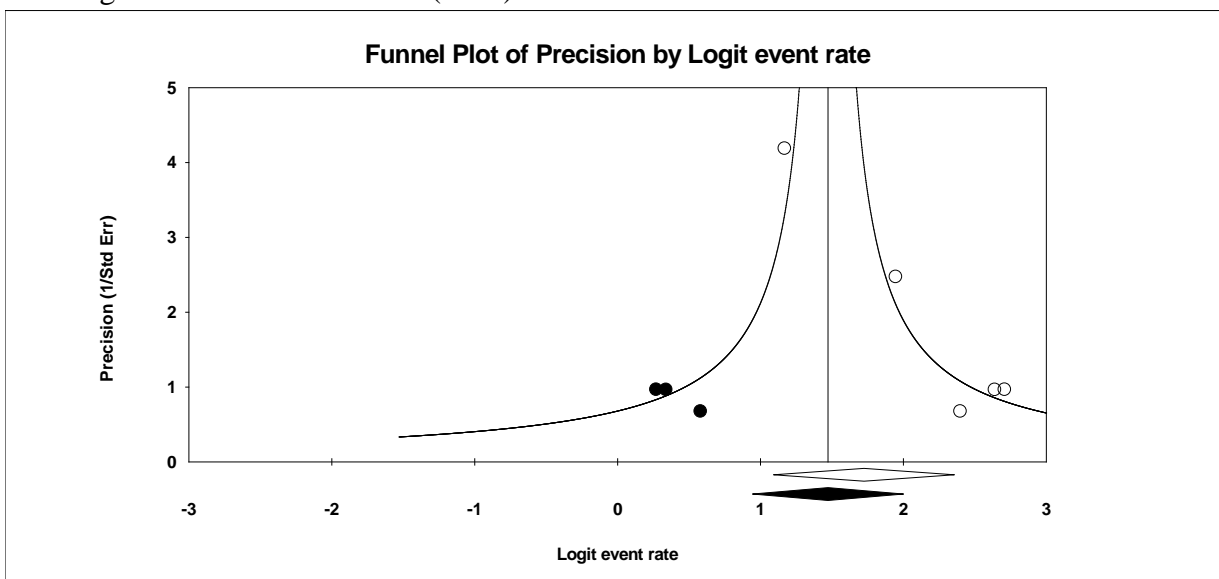

f. Hospitalization

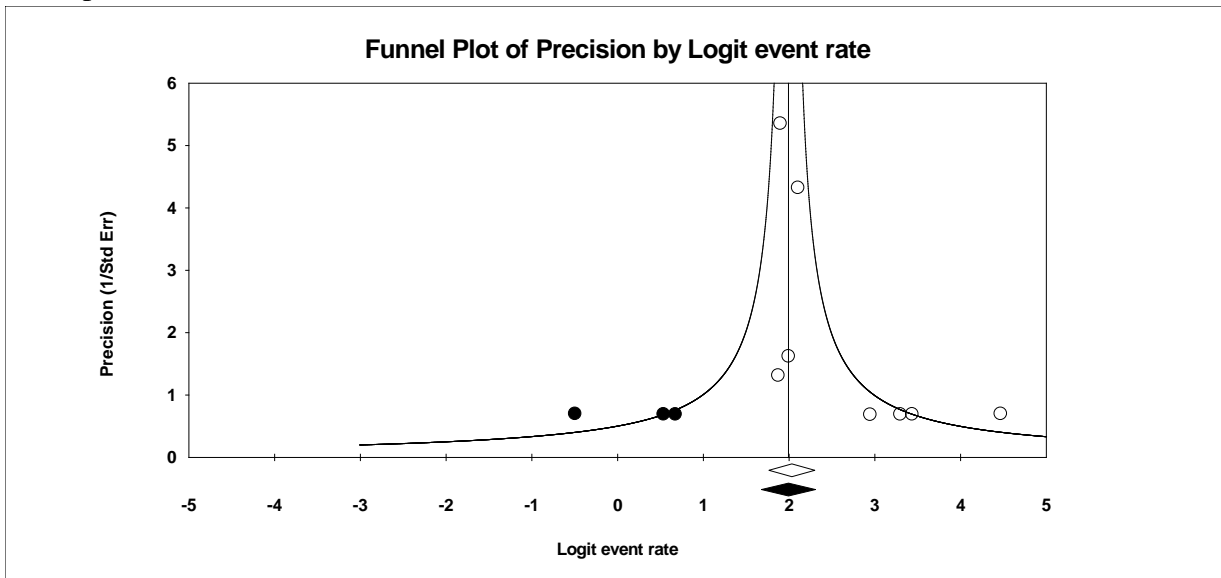

g. ICU admission

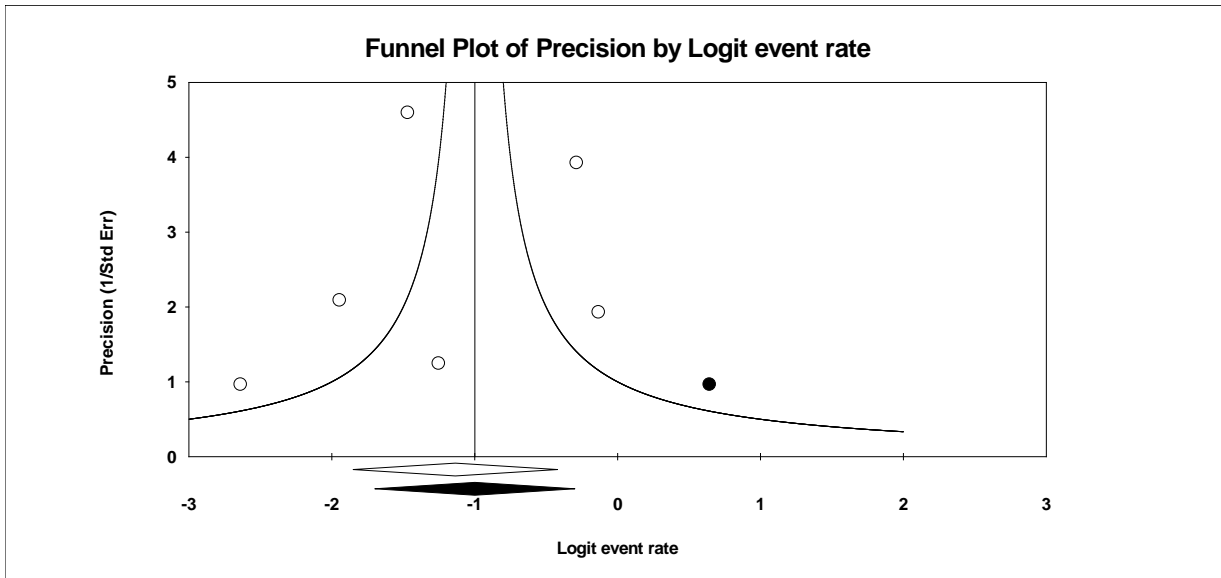

h. Hospital length of stay

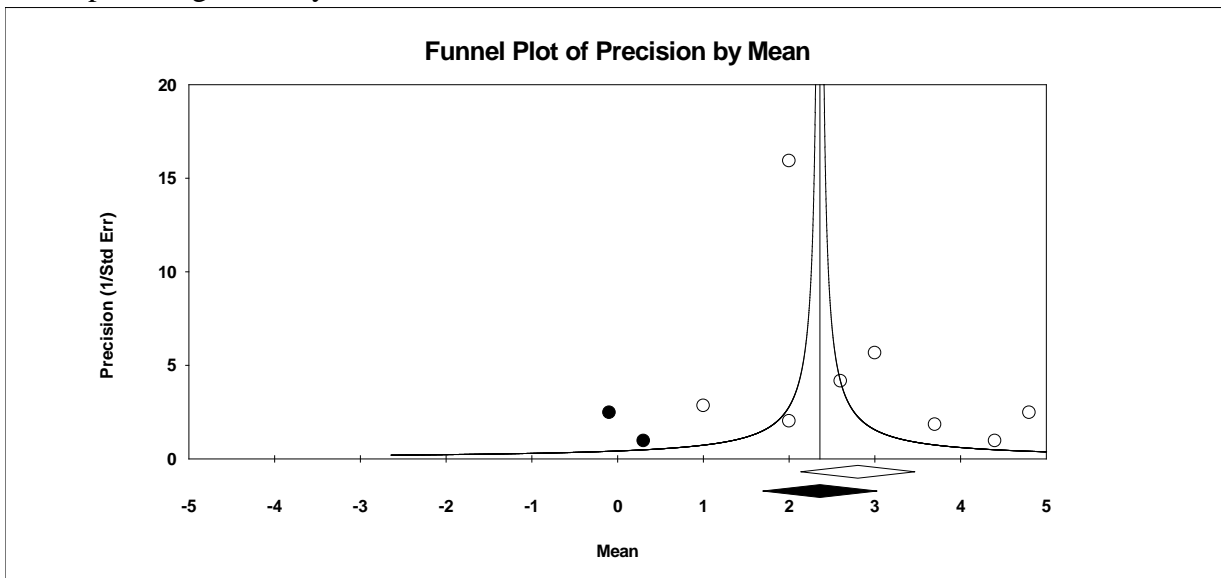

Abbreviations: ICU, intensive care unit; LV, left ventricular.
